# Supplementary material for: Distinct signals and immune cells drive liver pathology and glomerulonephritis in ABIN1[D485N] mice
Source: Life Sci Alliance. 2019 Nov 6;2(6):e201900533. doi: 10.26508/lsa.201900533 (PMC6836709; doi:10.26508/lsa.201900533)
Supplement: Supplementary file 1 [file LSA-2019-00533_SdataF1.xlsx]

## Sheet: 1A Spleen weight
RAW data					Shapiro-Wilk test						ANOVA summary							Tukey's multiple comparisons test
WT	ABIN1	IL-6	ABIN1xIL-6			WT	ABIN1	IL-6	ABIN1xIL-6		Table Analyzed	Spleen weight
0.0791	0.838	0.0608	0.229		Test for normal distribution						Data sets analyzed	A-D						Number of families	1
0.078	0.4694	0.067	0.1928		Shapiro-Wilk test													Number of comparisons per family	6
0.0914	0.3316	0.0571	0.204		W	0.9496	0.9352	0.9038	0.9665		ANOVA summary							Alpha	0.05
0.0656		0.0589	0.13		P value	0.7373	0.5086	0.4313	0.8684		F	19.7
0.073		0.0689	0.16		Passed normality test (alpha=0.05)?	Yes	Yes	Yes	Yes		P value	<0.0001						Tukey's multiple comparisons test	Mean Diff.	95.00% CI of diff.	Significant?	Summary	Adjusted P Value
0.076			0.15		P value summary	ns	ns	ns	ns		P value summary	****						WT vs. ABIN1	-0.469	-0.661 to -0.277	Yes	****	<0.0001	A-B
											Significant diff. among means (P < 0.05)?	Yes						WT vs. IL-6	0.0146	-0.150 to 0.179	No	ns	0.994	A-C
					Number of values	6	3	5	6		R square	0.787						WT vs. ABIN1xIL-6	-0.1	-0.257 to 0.0565	No	ns	0.2956	A-D
																		ABIN1 vs. IL-6	0.484	0.285 to 0.682	Yes	****	<0.0001	B-C
											Brown-Forsythe test							ABIN1 vs. ABIN1xIL-6	0.369	0.176 to 0.561	Yes	***	0.0003	B-D
											F (DFn, DFd)	4.80 (3, 16)						IL-6 vs. ABIN1xIL-6	-0.115	-0.280 to 0.0495	No	ns	0.2288	C-D
											P value	0.0143
											P value summary	*						Test details	Mean 1	Mean 2	Mean Diff.	SE of diff.	n1	n2	q	DF
											Are SDs significantly different (P < 0.05)?	Yes						WT vs. ABIN1	0.0772	0.546	-0.469	0.0672	6	3	9.87	16
																		WT vs. IL-6	0.0772	0.0625	0.0146	0.0575	6	5	0.36	16
											Bartlett's test							WT vs. ABIN1xIL-6	0.0772	0.178	-0.1	0.0549	6	6	2.59	16
											Bartlett's statistic (corrected)							ABIN1 vs. IL-6	0.546	0.0625	0.484	0.0694	3	5	9.86	16
											P value							ABIN1 vs. ABIN1xIL-6	0.546	0.178	0.369	0.0672	3	6	7.76	16
											P value summary							IL-6 vs. ABIN1xIL-6	0.0625	0.178	-0.115	0.0575	5	6	2.83	16
											Are SDs significantly different (P < 0.05)?
											ANOVA table	SS	DF	MS	F (DFn, DFd)	P value
											Treatment (between columns)	0.534	3	0.178	F (3, 16) = 19.7	P<0.0001
											Residual (within columns)	0.144	16	0.00903
											Total	0.679	19
											Data summary
											Number of treatments (columns)	4
											Number of values (total)	20

## Sheet: 1B GCB cells
RAW data					Shapiro-Wilk test						ANOVA summary							Tukey's multiple comparisons test
WT	ABIN1	IL-6	ABIN1xIL-6			WT	ABIN1	IL-6	ABIN1xIL-6									Number of families	1
0.15606	0.24867	0.011648	0.058944		Test for normal distribution						Table Analyzed	GC B cells						Number of comparisons per family	6
0.26101	2.1	0.010144	0.12513		Shapiro-Wilk test						Data sets analyzed	A-D						Alpha	0.05
0.04661	1.9845	0.01245	0.1188		W	0.9413	0.8529	0.8292	0.8554
0.31115	0.15606	0.00852	0.0948		P value	0.675	0.2039	0.0787	0.1738		ANOVA summary							Tukey's multiple comparisons test	Mean Diff.	95.00% CI of diff.	Significant?	Summary	Adjusted P Value
0.08838	1.3348	0.003788	0.11934		Passed normality test (alpha=0.05)?	Yes	Yes	Yes	Yes		F	8.257						WT vs. ABIN1	-0.9922	-1.755 to -0.2289	Yes	**	0.0084	A-B
		0.031734	0.2318		P value summary	ns	ns	ns	ns		P value	0.001						WT vs. IL-6	0.1593	-0.5473 to 0.8659	No	ns	0.9198	A-C
		0.01512									P value summary	**						WT vs. ABIN1xIL-6	0.04784	-0.6829 to 0.7786	No	ns	0.9977	A-D
					Number of values	5	5	7	6		Significant diff. among means (P < 0.05)?	Yes						ABIN1 vs. IL-6	1.151	0.4448 to 1.858	Yes	**	0.0011	B-C
											R square	0.5659						ABIN1 vs. ABIN1xIL-6	1.04	0.3093 to 1.771	Yes	**	0.0039	B-D
																		IL-6 vs. ABIN1xIL-6	-0.1115	-0.7829 to 0.5599	No	ns	0.9654	C-D
											Brown-Forsythe test
											F (DFn, DFd)	13.68 (3, 19)						Test details	Mean 1	Mean 2	Mean Diff.	SE of diff.	n1	n2	q	DF
											P value	<0.0001						WT vs. ABIN1	0.1726	1.165	-0.9922	0.2714	5	5	5.169	19
											P value summary	****						WT vs. IL-6	0.1726	0.01334	0.1593	0.2513	5	7	0.8965	19
											Are SDs significantly different (P < 0.05)?	Yes						WT vs. ABIN1xIL-6	0.1726	0.1248	0.04784	0.2599	5	6	0.2603	19
																		ABIN1 vs. IL-6	1.165	0.01334	1.151	0.2513	5	7	6.48	19
											Bartlett's test							ABIN1 vs. ABIN1xIL-6	1.165	0.1248	1.04	0.2599	5	6	5.659	19
											Bartlett's statistic (corrected)	65.29						IL-6 vs. ABIN1xIL-6	0.01334	0.1248	-0.1115	0.2388	7	6	0.6601	19
											P value	<0.0001
											P value summary	****
											Are SDs significantly different (P < 0.05)?	Yes
											ANOVA table	SS	DF	MS	F (DFn, DFd)	P value
											Treatment (between columns)	4.563	3	1.521	F (3, 19) = 8.257	P=0.0010
											Residual (within columns)	3.5	19	0.1842
											Total	8.062	22
											Data summary
											Number of treatments (columns)	4
											Number of values (total)	23

## Sheet: 1C anti-dsDNA
RAW data					Shapiro-Wilk test						ANOVA summary							Tukey's multiple comparisons test
WT	ABIN1[D485N]	IL6 KO	ABIN1[D485N]xIL6 KO			WT	ABIN1[D485N]	IL6 KO	ABIN1[D485N]xIL6 KO
7.64383	29.4695	6.48259	10.6331		Test for normal distribution						Table Analyzed	anti-dsDNA						Number of families	1
11.6282	44.558	5.79341	10.2002		Shapiro-Wilk test						Data sets analyzed	A-D						Number of comparisons per family	6
9.06248	23.0589	4.85508	8.99527		W	0.9915	0.7804	0.9039	0.8676									Alpha	0.05
10.4001	23.5023	4.85508	19.0686		P value	0.9652	0.0556	0.4318	0.2569		ANOVA summary
	25.8891	7.71176	16.1355		Passed normality test (alpha=0.05)?	Yes	Yes	Yes	Yes		F	19.17						Tukey's multiple comparisons test	Mean Diff.	95.00% CI of diff.	Significant?	Summary	Adjusted P Value
					P value summary	ns	ns	ns	ns		P value	<0.0001						WT vs. ABIN1[D485N]	-19.61	-29.69 to -9.531	Yes	***	0.0003	A-B
											P value summary	****						WT vs. IL6 KO	3.744	-6.337 to 13.83	No	ns	0.712	A-C
					Number of values	4	5	5	5		Significant diff. among means (P < 0.05)?	Yes						WT vs. ABIN1[D485N]xIL6 KO	-3.323	-13.40 to 6.758	No	ns	0.7789	A-D
											R square	0.7932						ABIN1[D485N] vs. IL6 KO	23.36	13.85 to 32.86	Yes	****	<0.0001	B-C
																		ABIN1[D485N] vs. ABIN1[D485N]xIL6 KO	16.29	6.784 to 25.79	Yes	***	0.0009	B-D
											Brown-Forsythe test							IL6 KO vs. ABIN1[D485N]xIL6 KO	-7.067	-16.57 to 2.438	No	ns	0.1845	C-D
											F (DFn, DFd)	1.136 (3, 15)
											P value	0.3663						Test details	Mean 1	Mean 2	Mean Diff.	SE of diff.	n1	n2	q	DF
											P value summary	ns						WT vs. ABIN1[D485N]	9.684	29.3	-19.61	3.498	4	5	7.929	15
											Are SDs significantly different (P < 0.05)?	No						WT vs. IL6 KO	9.684	5.94	3.744	3.498	4	5	1.514	15
																		WT vs. ABIN1[D485N]xIL6 KO	9.684	13.01	-3.323	3.498	4	5	1.343	15
											Bartlett's test							ABIN1[D485N] vs. IL6 KO	29.3	5.94	23.36	3.298	5	5	10.02	15
											Bartlett's statistic (corrected)	13.95						ABIN1[D485N] vs. ABIN1[D485N]xIL6 KO	29.3	13.01	16.29	3.298	5	5	6.985	15
											P value	0.003						IL6 KO vs. ABIN1[D485N]xIL6 KO	5.94	13.01	-7.067	3.298	5	5	3.031	15
											P value summary	**
											Are SDs significantly different (P < 0.05)?	Yes
											ANOVA table	SS	DF	MS	F (DFn, DFd)	P value
											Treatment (between columns)	1564	3	521.3	F (3, 15) = 19.17	P<0.0001
											Residual (within columns)	407.8	15	27.19
											Total	1972	18
											Data summary
											Number of treatments (columns)	4
											Number of values (total)	19

## Sheet: 1D IgM, IgG1 and IgG2b
IgM						Shapiro-Wilk test IgM						ANOVA summary IgM							Tukey's multiple comparisons test
WT	ABIN1[D485N]	IL-6 KO	ABIN1[D485N]xIL-6 KO				WT	ABIN1[D485N]	IL-6 KO	ABIN1[D485N]xIL-6 KO
2.21861	13.0349	1.27582	2.79742			Test for normal distribution						Table Analyzed	IgM						Number of families	1
3.04386	10.3919	1.79855	1.74565			Shapiro-Wilk test						Data sets analyzed	A-D						Number of comparisons per family	6
4.05664	7.86203	0.888287	2.40762			W	0.9503	0.9672	0.9174	0.8997									Alpha	0.05
2.62217	11.3558	0.593308	2.89079			P value	0.7178	0.8569	0.5135	0.4083		ANOVA summary
	8.61271	0.728615	2.43814			Passed normality test (alpha=0.05)?	Yes	Yes	Yes	Yes		F	60.33						Tukey's multiple comparisons test	Mean Diff.	95.00% CI of diff.	Significant?	Summary	Adjusted P Value
						P value summary	ns	ns	ns	ns		P value	<0.0001						WT vs. ABIN1[D485N]	-7.266	-9.555 to -4.978	Yes	****	<0.0001	A-B
												P value summary	****						WT vs. IL-6 KO	1.928	-0.3600 to 4.217	No	ns	0.114	A-C
						Number of values	4	5	5	5		Significant diff. among means (P < 0.05)?	Yes						WT vs. ABIN1[D485N]xIL-6 KO	0.5294	-1.759 to 2.818	No	ns	0.9079	A-D
												R square	0.9235						ABIN1[D485N] vs. IL-6 KO	9.195	7.037 to 11.35	Yes	****	<0.0001	B-C
																			ABIN1[D485N] vs. ABIN1[D485N]xIL-6 KO	7.796	5.638 to 9.953	Yes	****	<0.0001	B-D
												Brown-Forsythe test							IL-6 KO vs. ABIN1[D485N]xIL-6 KO	-1.399	-3.557 to 0.7585	No	ns	0.2819	C-D
												F (DFn, DFd)	4.148 (3, 15)
												P value	0.0251						Test details	Mean 1	Mean 2	Mean Diff.	SE of diff.	n1	n2	q	DF
												P value summary	*						WT vs. ABIN1[D485N]	2.985	10.25	-7.266	0.794	4	5	12.94	15
												Are SDs significantly different (P < 0.05)?	Yes						WT vs. IL-6 KO	2.985	1.057	1.928	0.794	4	5	3.435	15
																			WT vs. ABIN1[D485N]xIL-6 KO	2.985	2.456	0.5294	0.794	4	5	0.9429	15
												Bartlett's test							ABIN1[D485N] vs. IL-6 KO	10.25	1.057	9.195	0.7486	5	5	17.37	15
												Bartlett's statistic (corrected)	11.43						ABIN1[D485N] vs. ABIN1[D485N]xIL-6 KO	10.25	2.456	7.796	0.7486	5	5	14.73	15
												P value	0.0096						IL-6 KO vs. ABIN1[D485N]xIL-6 KO	1.057	2.456	-1.399	0.7486	5	5	2.643	15
												P value summary	**
												Are SDs significantly different (P < 0.05)?	Yes
												ANOVA table	SS	DF	MS	F (DFn, DFd)	P value
												Treatment (between columns)	253.6	3	84.52	F (3, 15) = 60.33	P<0.0001
												Residual (within columns)	21.01	15	1.401
												Total	274.6	18
												Data summary
												Number of treatments (columns)	4
												Number of values (total)	19
						Shapiro-Wilk test IgG1						ANOVA summary IgG1							Tukey's multiple comparisons test
IgG1							WT	ABIN1[D485N]	IL-6 KO	ABIN1[D485N]xIL-6 KO		Table Analyzed	IgG1						Number of comparisons per family	6
WT	ABIN1[D485N]	IL-6 KO	ABIN1[D485N]xIL-6 KO			Test for normal distribution						Data sets analyzed	A-D						Alpha	0.05
1.59445	32.1027	1.61017	0.951253			Shapiro-Wilk test
1.76536	15.956	0.652256	2.049			W	0.9411	0.8687	0.9361	0.8539		ANOVA summary							Tukey's multiple comparisons test	Mean Diff.	95.00% CI of diff.	Significant?	Summary	Adjusted P Value
0.631696	11.3805	0.823688	2.60303			P value	0.6608	0.2611	0.6386	0.2071		F	9.472						WT vs. ABIN1[D485N]	-14.24	-24.22 to -4.271	Yes	**	0.0045	A-B
1.18229	5.89368	0.411697	0.793995			Passed normality test (alpha=0.05)?	Yes	Yes	Yes	Yes		P value	0.0009						WT vs. IL-6 KO	0.3998	-9.573 to 10.37	No	ns	0.9994	A-C
	12.3526	0.970268	1.04788			P value summary	ns	ns	ns	ns		P value summary	***						WT vs. ABIN1[D485N]xIL-6 KO	-0.1956	-10.17 to 9.777	No	ns	>0.9999	A-D
												Significant diff. among means (P < 0.05)?	Yes						ABIN1[D485N] vs. IL-6 KO	14.64	5.241 to 24.05	Yes	**	0.0022	B-C
						Number of values	4	5	5	5		R square	0.6545						ABIN1[D485N] vs. ABIN1[D485N]xIL-6 KO	14.05	4.646 to 23.45	Yes	**	0.0031	B-D
																			IL-6 KO vs. ABIN1[D485N]xIL-6 KO	-0.5954	-9.998 to 8.807	No	ns	0.9977	C-D
												Brown-Forsythe test
												F (DFn, DFd)	2.343 (3, 15)						Test details	Mean 1	Mean 2	Mean Diff.	SE of diff.	n1	n2	q	DF
												P value	0.1142						WT vs. ABIN1[D485N]	1.293	15.54	-14.24	3.46	4	5	5.821	15
												P value summary	ns						WT vs. IL-6 KO	1.293	0.8936	0.3998	3.46	4	5	0.1634	15
												Are SDs significantly different (P < 0.05)?	No						WT vs. ABIN1[D485N]xIL-6 KO	1.293	1.489	-0.1956	3.46	4	5	0.07994	15
																			ABIN1[D485N] vs. IL-6 KO	15.54	0.8936	14.64	3.262	5	5	6.348	15
												Bartlett's test							ABIN1[D485N] vs. ABIN1[D485N]xIL-6 KO	15.54	1.489	14.05	3.262	5	5	6.09	15
												Bartlett's statistic (corrected)	38.78						IL-6 KO vs. ABIN1[D485N]xIL-6 KO	0.8936	1.489	-0.5954	3.262	5	5	0.2581	15
												P value	<0.0001
												P value summary	****
												Are SDs significantly different (P < 0.05)?	Yes
												ANOVA table	SS	DF	MS	F (DFn, DFd)	P value
												Treatment (between columns)	756	3	252	F (3, 15) = 9.472	P=0.0009
												Residual (within columns)	399.1	15	26.61
												Total	1155	18
												Data summary
												Number of treatments (columns)	4
												Number of values (total)	19
IgG2b						Shapiro-Wilk test IgG2b						ANOVA summary IgG2b							Tukey's multiple comparisons test
WT	ABIN1[D485N]	IL-6 KO	ABIN1[D485N]xIL-6 KO				WT	ABIN1[D485N]	IL-6 KO	ABIN1[D485N]xIL-6 KO									Number of families	1
1.01356	11.5727	1.65313	3.86866			Test for normal distribution						Table Analyzed	IgG2b						Number of comparisons per family	6
6.71399	8.00553	0.480712	2.20282			Shapiro-Wilk test						Data sets analyzed	A-D						Alpha	0.05
2.04115	5.60649	0.770496	3.10989			W	0.7774	0.9843	0.9252	0.8995
1.63864	10.0423	0.389301	2.17762			P value	0.0674	0.9563	0.5638	0.4073		ANOVA summary							Tukey's multiple comparisons test	Mean Diff.	95.00% CI of diff.	Significant?	Summary	Adjusted P Value
	8.41855	1.10138	4.39175			Passed normality test (alpha=0.05)?	Yes	Yes	Yes	Yes		F	18.59						WT vs. ABIN1[D485N]	-5.877	-9.247 to -2.507	Yes	***	0.0008	A-B
						P value summary	ns	ns	ns	ns		P value	<0.0001						WT vs. IL-6 KO	1.973	-1.397 to 5.343	No	ns	0.3638	A-C
												P value summary	****						WT vs. ABIN1[D485N]xIL-6 KO	-0.2983	-3.668 to 3.071	No	ns	0.9939	A-D
						Number of values	4	5	5	5		Significant diff. among means (P < 0.05)?	Yes						ABIN1[D485N] vs. IL-6 KO	7.85	4.673 to 11.03	Yes	****	<0.0001	B-C
												R square	0.788						ABIN1[D485N] vs. ABIN1[D485N]xIL-6 KO	5.579	2.402 to 8.756	Yes	***	0.0007	B-D
																			IL-6 KO vs. ABIN1[D485N]xIL-6 KO	-2.271	-5.448 to 0.9059	No	ns	0.2106	C-D
												Brown-Forsythe test
												F (DFn, DFd)	1.038 (3, 15)						Test details	Mean 1	Mean 2	Mean Diff.	SE of diff.	n1	n2	q	DF
												P value	0.404						WT vs. ABIN1[D485N]	2.852	8.729	-5.877	1.169	4	5	7.109	15
												P value summary	ns						WT vs. IL-6 KO	2.852	0.879	1.973	1.169	4	5	2.386	15
												Are SDs significantly different (P < 0.05)?	No						WT vs. ABIN1[D485N]xIL-6 KO	2.852	3.15	-0.2983	1.169	4	5	0.3608	15
																			ABIN1[D485N] vs. IL-6 KO	8.729	0.879	7.85	1.102	5	5	10.07	15
												Bartlett's test							ABIN1[D485N] vs. ABIN1[D485N]xIL-6 KO	8.729	3.15	5.579	1.102	5	5	7.157	15
												Bartlett's statistic (corrected)	8.853						IL-6 KO vs. ABIN1[D485N]xIL-6 KO	0.879	3.15	-2.271	1.102	5	5	2.914	15
												P value	0.0313
												P value summary	*
												Are SDs significantly different (P < 0.05)?	Yes
												ANOVA table	SS	DF	MS	F (DFn, DFd)	P value
												Treatment (between columns)	169.4	3	56.46	F (3, 15) = 18.59	P<0.0001
												Residual (within columns)	45.57	15	3.038
												Total	214.9	18
												Data summary
												Number of treatments (columns)	4
												Number of values (total)	19

## Sheet: 1E IgG2a and IgE
IgG2a					Shapiro-Wilk test IgG2a						Kruskal-Wallis test			Mann Whitney test			Mann Whitney test			Mann Whitney test
WT	ABIN1[D485N]	IL-6 KO	ABIN1[D485N]xIL-6 KO			WT	ABIN1[D485N]	IL-6 KO	ABIN1[D485N]xIL-6 KO		Table Analyzed	IgG2a		Table Analyzed	IgG2a		Table Analyzed	IgG2a		Table Analyzed	IgG2a
0.0338549	0.0702657	0.0183985	0.0672509		Test for normal distribution
0.0183985	0.0777935	0.0152628	0.0230682		Shapiro-Wilk test						Kruskal-Wallis test			Column B	ABIN1[D485N]		Column C	IL-6 KO		Column D	ABIN1[D485N]xIL-6 KO
0.0566779	0.0943181	0.0292472	0.0491008		W	0.9407	0.6813	0.9705	0.9343		P value	0.0075		vs.	vs.		vs.	vs.		vs.	vs.
0.0307853	0.247115	0.0005964	0.0121031		P value	0.6585	0.006	0.8783	0.6263		Exact or approximate P value?	Approximate		Column A	WT		Column B	ABIN1[D485N]		Column B	ABIN1[D485N]
	0.0943181	0.0353866	0.0491008		Passed normality test (alpha=0.05)?	Yes	No	Yes	Yes		P value summary	**
					P value summary	ns	**	ns	ns		Do the medians vary signif. (P < 0.05)?	Yes		Mann Whitney test			Mann Whitney test			Mann Whitney test
											Number of groups	4		P value	0.0159		P value	0.0079		P value	0.0079
					Number of values	4	5	5	5		Kruskal-Wallis statistic	11.96		Exact or approximate P value?	Exact		Exact or approximate P value?	Exact		Exact or approximate P value?	Exact
														P value summary	*		P value summary	**		P value summary	**
											Data summary			Significantly different (P < 0.05)?	Yes		Significantly different (P < 0.05)?	Yes		Significantly different (P < 0.05)?	Yes
											Number of treatments (columns)	4		One- or two-tailed P value?	Two-tailed		One- or two-tailed P value?	Two-tailed		One- or two-tailed P value?	Two-tailed
											Number of values (total)	19		Sum of ranks in column A,B	10 , 35		Sum of ranks in column B,C	40 , 15		Sum of ranks in column B,D	40 , 15
														Mann-Whitney U	0		Mann-Whitney U	0		Mann-Whitney U	0
														Difference between medians			Difference between medians			Difference between medians
														Median of column A	0.03232, n=4		Median of column B	0.09432, n=5		Median of column B	0.09432, n=5
														Median of column B	0.09432, n=5		Median of column C	0.01840, n=5		Median of column D	0.04910, n=5
														Difference: Actual	0.062		Difference: Actual	-0.07592		Difference: Actual	-0.04522
														Difference: Hodges-Lehmann	0.05993		Difference: Hodges-Lehmann	-0.06967		Difference: Hodges-Lehmann	-0.0472
IgE					Shapiro-Wilk test IgE						Kruskal-Wallis test			Mann Whitney test			Mann Whitney test			Mann Whitney test
WT	ABIN1[D485N]	IL-6 KO	ABIN1[D485N]xIL-6 KO			WT	ABIN1[D485N]	IL-6 KO	ABIN1[D485N]xIL-6 KO		Table Analyzed	IgE		Table Analyzed	IgE		Table Analyzed	IgE		Table Analyzed	IgE
0.00178472	0.205555	0.0023841	0.00771053		Test for normal distribution
0.00958646	0.126141	0.00294687	0.00124626		Shapiro-Wilk test						Kruskal-Wallis test			Column B	ABIN1[D485N]		Column C	IL-6 KO		Column D	ABIN1[D485N]xIL-6 KO
0.00084659	0.0728395	0.00032867	0.00579177		W	0.7422	0.95	0.7942	0.8882		P value	0.0063		vs.	vs.		vs.	vs.		vs.	vs.
0.00043651	0.158516	0.00026479	0.00967191		P value	0.0325	0.7372	0.0726	0.348		Exact or approximate P value?	Approximate		Column A	WT		Column B	ABIN1[D485N]		Column B	ABIN1[D485N]
	0.0853321	0.00050193	0.00118859		Passed normality test (alpha=0.05)?	No	Yes	Yes	Yes		P value summary	**
					P value summary	*	ns	ns	ns		Do the medians vary signif. (P < 0.05)?	Yes		Mann Whitney test			Mann Whitney test			Mann Whitney test
											Number of groups	4		P value	0.0159		P value	0.0079		P value	0.0079
					Number of values	4	5	5	5		Kruskal-Wallis statistic	12.33		Exact or approximate P value?	Exact		Exact or approximate P value?	Exact		Exact or approximate P value?	Exact
														P value summary	*		P value summary	**		P value summary	**
											Data summary			Significantly different (P < 0.05)?	Yes		Significantly different (P < 0.05)?	Yes		Significantly different (P < 0.05)?	Yes
											Number of treatments (columns)	4		One- or two-tailed P value?	Two-tailed		One- or two-tailed P value?	Two-tailed		One- or two-tailed P value?	Two-tailed
											Number of values (total)	19		Sum of ranks in column A,B	10 , 35		Sum of ranks in column B,C	40 , 15		Sum of ranks in column B,D	40 , 15
														Mann-Whitney U	0		Mann-Whitney U	0		Mann-Whitney U	0
														Difference between medians			Difference between medians			Difference between medians
														Median of column A	0.001316, n=4		Median of column B	0.1261, n=5		Median of column B	0.1261, n=5
														Median of column B	0.1261, n=5		Median of column C	0.0005019, n=5		Median of column D	0.005792, n=5
														Difference: Actual	0.1248		Difference: Actual	-0.1256		Difference: Actual	-0.1203
														Difference: Hodges-Lehmann	0.1248		Difference: Hodges-Lehmann	-0.1256		Difference: Hodges-Lehmann	-0.1203

## Sheet: 1F glomerulonephritis score
RAW data					Shapiro-Wilk test						Kruskal-Wallis test			Mann Whitney test
WT	ABIN1 KI	IL-6 KO	ABIN1 KIXIL-6 KO			WT	ABIN1 KI	IL-6 KO	ABIN1 KIXIL-6 KO					Table Analyzed	Kidney
0	1.75	0	0.1		Test for normal distribution						Table Analyzed	Kidney
0	3.2	0	0.45		Shapiro-Wilk test									Column B	ABIN1 KI
0.1	2.55	0	0.1		W	0.5522	0.8761	Invalid input data	0.6972		Kruskal-Wallis test			vs.	vs.
0	3.15	0	0.1		P value	0.0001	0.3224		0.0058		P value	0.0007		Column A	WT
0		0	0.35		Passed normality test (alpha=0.05)?	No	Yes		No		Exact or approximate P value?	Approximate
			0.1		P value summary	***	ns		**		P value summary	***		Mann Whitney test
											Do the medians vary signif. (P < 0.05)?	Yes		P value	0.0159
					Number of values	5	4	5	6		Number of groups	4		Exact or approximate P value?	Exact
											Kruskal-Wallis statistic	17.05		P value summary	*
														Significantly different (P < 0.05)?	Yes
											Data summary			One- or two-tailed P value?	Two-tailed
											Number of treatments (columns)	4		Sum of ranks in column A,B	15 , 30
											Number of values (total)	20		Mann-Whitney U	0
														Difference between medians
														Median of column A	0.000, n=5
														Median of column B	2.850, n=4
														Difference: Actual	2.85
														Difference: Hodges-Lehmann	2.8
														Mann Whitney test
														Table Analyzed	Kidney
														Column C	IL-6 KO
														vs.	vs.
														Column B	ABIN1 KI
														Mann Whitney test
														P value	0.0079
														Exact or approximate P value?	Exact
														P value summary	**
														Significantly different (P < 0.05)?	Yes
														One- or two-tailed P value?	Two-tailed
														Sum of ranks in column B,C	30 , 15
														Mann-Whitney U	0
														Difference between medians
														Median of column B	2.850, n=4
														Median of column C	0.000, n=5
														Difference: Actual	-2.85
														Difference: Hodges-Lehmann	-2.85
														Mann Whitney test
														Table Analyzed	Kidney
														Column D	ABIN1 KIXIL-6 KO
														vs.	vs.
														Column B	ABIN1 KI
														Mann Whitney test
														P value	0.0095
														Exact or approximate P value?	Exact
														P value summary	**
														Significantly different (P < 0.05)?	Yes
														One- or two-tailed P value?	Two-tailed
														Sum of ranks in column B,D	34 , 21
														Mann-Whitney U	0
														Difference between medians
														Median of column B	2.850, n=4
														Median of column D	0.1000, n=6
														Difference: Actual	-2.75
														Difference: Hodges-Lehmann	-2.575

## Sheet: 1G Liver
RAW data					Shapiro-Wilk test						ANOVA summary							Tukey's multiple comparisons test
WT	ABIN1 KI	IL-6 KO	ABIN1 KIXIL-6 KO			WT	ABIN1 KI	IL-6 KO	ABIN1 KIXIL-6 KO
0	2.95	0.15	1.8		Test for normal distribution						Table Analyzed	Liver						Number of families	1
0.2	3.05	0.05	2.65		Shapiro-Wilk test						Data sets analyzed	A-D						Number of comparisons per family	6
0.3	2.45	0.1	2.5		W	0.902	0.8821	0.9031	0.8399									Alpha	0.05
0.15	2.55	0	2.35		P value	0.4211	0.3476	0.4272	0.1301		ANOVA summary
0		0.35	2.35		Passed normality test (alpha=0.05)?	Yes	Yes	Yes	Yes		F	185.3						Tukey's multiple comparisons test	Mean Diff.	95.00% CI of diff.	Significant?	Summary	Adjusted P Value
			2.45		P value summary	ns	ns	ns	ns		P value	<0.0001						WT vs. ABIN1 KI	-2.62	-3.056 to -2.184	Yes	****	<0.0001	A-B
											P value summary	****						WT vs. IL-6 KO	0	-0.4111 to 0.4111	No	ns	>0.9999	A-C
					Number of values	5	4	5	6		Significant diff. among means (P < 0.05)?	Yes						WT vs. ABIN1 KIXIL-6 KO	-2.22	-2.614 to -1.826	Yes	****	<0.0001	A-D
											R square	0.972						ABIN1 KI vs. IL-6 KO	2.62	2.184 to 3.056	Yes	****	<0.0001	B-C
																		ABIN1 KI vs. ABIN1 KIXIL-6 KO	0.4	-0.01961 to 0.8196	No	ns	0.0645	B-D
											Brown-Forsythe test							IL-6 KO vs. ABIN1 KIXIL-6 KO	-2.22	-2.614 to -1.826	Yes	****	<0.0001	C-D
											F (DFn, DFd)	1.346 (3, 16)
											P value	0.2948						Test details	Mean 1	Mean 2	Mean Diff.	SE of diff.	n1	n2	q	DF
											P value summary	ns						WT vs. ABIN1 KI	0.13	2.75	-2.62	0.1524	5	4	24.31	16
											Are SDs significantly different (P < 0.05)?	No						WT vs. IL-6 KO	0.13	0.13	0	0.1437	5	5	0	16
																		WT vs. ABIN1 KIXIL-6 KO	0.13	2.35	-2.22	0.1376	5	6	22.82	16
											Bartlett's test							ABIN1 KI vs. IL-6 KO	2.75	0.13	2.62	0.1524	4	5	24.31	16
											Bartlett's statistic (corrected)	4.112						ABIN1 KI vs. ABIN1 KIXIL-6 KO	2.75	2.35	0.4	0.1467	4	6	3.857	16
											P value	0.2497						IL-6 KO vs. ABIN1 KIXIL-6 KO	0.13	2.35	-2.22	0.1376	5	6	22.82	16
											P value summary	ns
											Are SDs significantly different (P < 0.05)?	No
											ANOVA table	SS	DF	MS	F (DFn, DFd)	P value
											Treatment (between columns)	28.71	3	9.569	F (3, 16) = 185.3	P<0.0001
											Residual (within columns)	0.826	16	0.05163
											Total	29.53	19
											Data summary
											Number of treatments (columns)	4
											Number of values (total)	20

## Sheet: 1H Lungs
RAW DATA					Shapiro-Wilk test						Kruskal-Wallis test			Mann Whitney test
WT	ABIN1 KI	IL-6 KO	ABIN1 KIXIL-6 KO		Test for normal distribution
0	1.6	0	0.8		Shapiro-Wilk test						Table Analyzed	Lungs		Table Analyzed	Lungs
0	2.4	0	2.2		W	0.684	0.8006	Invalid input data	0.8367
0.2	2.4	0	2.8		P value	0.0065	0.1032		0.1223		Kruskal-Wallis test			Column B	ABIN1 KI
0.2	2.6	0	0.6		Passed normality test (alpha=0.05)?	No	Yes		Yes		P value	0.0012		vs.	vs.
0		0	2.4		P value summary	**	ns		ns		Exact or approximate P value?	Approximate		Column A	WT
			0.8								P value summary	**
					Number of values	5	4	5	6		Do the medians vary signif. (P < 0.05)?	Yes		Mann Whitney test
											Number of groups	4		P value	0.0079
											Kruskal-Wallis statistic	15.95		Exact or approximate P value?	Exact
														P value summary	**
											Data summary			Significantly different (P < 0.05)?	Yes
											Number of treatments (columns)	4		One- or two-tailed P value?	Two-tailed
											Number of values (total)	20		Sum of ranks in column A,B	15 , 30
														Mann-Whitney U	0
														Difference between medians
														Median of column A	0.000, n=5
														Median of column B	2.400, n=4
														Difference: Actual	2.4
														Difference: Hodges-Lehmann	2.4
														Mann Whitney test
														Table Analyzed	Lungs
														Column C	IL-6 KO
														vs.	vs.
														Column B	ABIN1 KI
														Mann Whitney test
														P value	0.0079
														Exact or approximate P value?	Exact
														P value summary	**
														Significantly different (P < 0.05)?	Yes
														One- or two-tailed P value?	Two-tailed
														Sum of ranks in column B,C	30 , 15
														Mann-Whitney U	0
														Difference between medians
														Median of column B	2.400, n=4
														Median of column C	0.000, n=5
														Difference: Actual	-2.4
														Difference: Hodges-Lehmann	-2.4
														Mann Whitney test
														Table Analyzed	Lungs
														Column D	ABIN1 KIXIL-6 KO
														vs.	vs.
														Column B	ABIN1 KI
														Mann Whitney test
														P value	0.3143
														Exact or approximate P value?	Exact
														P value summary	ns
														Significantly different (P < 0.05)?	No
														One- or two-tailed P value?	Two-tailed
														Sum of ranks in column B,D	27 , 28
														Mann-Whitney U	7
														Difference between medians
														Median of column B	2.400, n=4
														Median of column D	1.500, n=6
														Difference: Actual	-0.9
														Difference: Hodges-Lehmann	-0.6
