# Supplementary material for: Distinct signals and immune cells drive liver pathology and glomerulonephritis in ABIN1[D485N] mice
Source: Life Sci Alliance. 2019 Nov 6;2(6):e201900533. doi: 10.26508/lsa.201900533 (PMC6836709; doi:10.26508/lsa.201900533)
Supplement: Supplementary file 2 [file LSA-2019-00533_SdataF2.xlsx]

## Sheet: 2A Glomerulonephritis
RAW DATA					Shapiro-Wilk test						Mann Whitney test			Mann Whitney test
WT	ABIN1[D485N]	RAG2 KO	ABIN1[D485N]XRAG2KO			WT	ABIN1[D485N]	RAG2 KO	ABIN1[D485N]XRAG2KO		Table Analyzed	glomerulonephritis score		Table Analyzed	glomerulonephritis score
0	2.8	0	0		Test for normal distribution
0	3	0	0		Shapiro-Wilk test						Column B	ABIN1[D485N]		Column D	ABIN1[D485N]XRAG2KO
0	2.7	0	0		W	0.6298	0.8519	Invalid input data	Invalid input data		vs.	vs.		vs.	vs.
0.15	2.95	0	0		P value	0.0012	0.2006				Column A	WT		Column B	ABIN1[D485N]
	3	0	0		Passed normality test (alpha=0.05)?	No	Yes
		0	0		P value summary	**	ns				Mann Whitney test			Mann Whitney test
											P value	0.0159		P value	0.0022
					Number of values	4	5	6	6		Exact or approximate P value?	Exact		Exact or approximate P value?	Exact
											P value summary	*		P value summary	**
											Significantly different (P < 0.05)?	Yes		Significantly different (P < 0.05)?	Yes
											One- or two-tailed P value?	Two-tailed		One- or two-tailed P value?	Two-tailed
											Sum of ranks in column A,B	10 , 35		Sum of ranks in column B,D	45 , 21
											Mann-Whitney U	0		Mann-Whitney U	0
											Difference between medians			Difference between medians
											Median of column A	0.000, n=4		Median of column B	2.950, n=5
											Median of column B	2.950, n=5		Median of column D	0.000, n=6
											Difference: Actual	2.95		Difference: Actual	-2.95
											Difference: Hodges-Lehmann	2.85		Difference: Hodges-Lehmann	-2.95
											Mann Whitney test
											Table Analyzed	glomerulonephritis score
											Column C	RAG2 KO
											vs.	vs.
											Column B	ABIN1[D485N]
											Mann Whitney test
											P value	0.0022
											Exact or approximate P value?	Exact
											P value summary	**
											Significantly different (P < 0.05)?	Yes
											One- or two-tailed P value?	Two-tailed
											Sum of ranks in column B,C	45 , 21
											Mann-Whitney U	0
											Difference between medians
											Median of column B	2.950, n=5
											Median of column C	0.000, n=6
											Difference: Actual	-2.95
											Difference: Hodges-Lehmann	-2.95

## Sheet: 2B Lung pathology ABIN1xRAG2
RAW DATA					Shapiro-Wilk test						Mann Whitney test			Mann Whitney test
WT	ABIN1[D485N]	RAG2 KO	ABIN1[D485N]XRAG2KO			WT	ABIN1[D485N]	RAG2 KO	ABIN1[D485N]XRAG2KO		Table Analyzed	lung pathology		Table Analyzed	lung pathology
0	1.6	0	0.4		Test for normal distribution
0	2	1.8	0.2		Shapiro-Wilk test						Column B	ABIN1[D485N]		Column D	ABIN1[D485N]XRAG2KO
0	1	1.67	0.4		W	Invalid input data	0.9517	0.7791	0.8663		vs.	vs.		vs.	vs.
0	2.8	0	0.2		P value		0.7496	0.0378	0.2117		Column A	WT		Column B	ABIN1[D485N]
	0.8	0.4	0.2		Passed normality test (alpha=0.05)?		Yes	No	Yes
		0.2	0		P value summary		ns	*	ns		Mann Whitney test			Mann Whitney test
											P value	0.0159		P value	0.0022
					Number of values	4	5	6	6		Exact or approximate P value?	Exact		Exact or approximate P value?	Exact
											P value summary	*		P value summary	**
											Significantly different (P < 0.05)?	Yes		Significantly different (P < 0.05)?	Yes
											One- or two-tailed P value?	Two-tailed		One- or two-tailed P value?	Two-tailed
											Sum of ranks in column A,B	10 , 35		Sum of ranks in column B,D	45 , 21
											Mann-Whitney U	0		Mann-Whitney U	0
											Difference between medians			Difference between medians
											Median of column A	0.000, n=4		Median of column B	1.600, n=5
											Median of column B	1.600, n=5		Median of column D	0.2000, n=6
											Difference: Actual	1.6		Difference: Actual	-1.4
											Difference: Hodges-Lehmann	1.6		Difference: Hodges-Lehmann	-1.4
											Mann Whitney test
											Table Analyzed	lung pathology
											Column C	RAG2 KO
											vs.	vs.
											Column B	ABIN1[D485N]
											Mann Whitney test
											P value	0.119
											Exact or approximate P value?	Exact
											P value summary	ns
											Significantly different (P < 0.05)?	No
											One- or two-tailed P value?	Two-tailed
											Sum of ranks in column B,C	39 , 27
											Mann-Whitney U	6
											Difference between medians
											Median of column B	1.600, n=5
											Median of column C	0.3000, n=6
											Difference: Actual	-1.3
											Difference: Hodges-Lehmann	-1

## Sheet: 2C Liver pathology ABINxRAG2
RAW DATA					Shapiro-Wilk test
WT	ABIN1[D485N]	RAG2 KO	ABIN1[D485N]XRAG2KO			WT	ABIN1[D485N]	RAG2 KO	ABIN1[D485N]XRAG2KO		Mann Whitney test			Mann Whitney test
0	3.5	0	1.85		Test for normal distribution						Table Analyzed	liver pathology		Table Analyzed	liver pathology
0	2.45	0.05	1.85		Shapiro-Wilk test
0	1.6	0.1	1.95		W	0.5522	0.9331	0.7709	0.9062		Column B	ABIN1[D485N]		Column D	ABIN1[D485N]XRAG2KO
0.1	2.85	0	2.1		P value	0.0001	0.6174	0.046	0.4117		vs.	vs.		vs.	vs.
0	1.7		1.3		Passed normality test (alpha=0.05)?	No	Yes	No	Yes		Column A	WT		Column B	ABIN1[D485N]
		0	1.7		P value summary	***	ns	*	ns
											Mann Whitney test			Mann Whitney test
					Number of values	5	5	5	6		P value	0.0079		P value	0.3528
											Exact or approximate P value?	Exact		Exact or approximate P value?	Exact
											P value summary	**		P value summary	ns
											Significantly different (P < 0.05)?	Yes		Significantly different (P < 0.05)?	No
											One- or two-tailed P value?	Two-tailed		One- or two-tailed P value?	Two-tailed
											Sum of ranks in column A,B	15 , 40		Sum of ranks in column B,D	35.50 , 30.50
											Mann-Whitney U	0		Mann-Whitney U	9.5
											Difference between medians			Difference between medians
											Median of column A	0.000, n=5		Median of column B	2.450, n=5
											Median of column B	2.450, n=5		Median of column D	1.850, n=6
											Difference: Actual	2.45		Difference: Actual	-0.6
											Difference: Hodges-Lehmann	2.45		Difference: Hodges-Lehmann	-0.6
											Mann Whitney test
											Table Analyzed	liver pathology
											Column C	RAG2 KO
											vs.	vs.
											Column B	ABIN1[D485N]
											Mann Whitney test
											P value	0.0079
											Exact or approximate P value?	Exact
											P value summary	**
											Significantly different (P < 0.05)?	Yes
											One- or two-tailed P value?	Two-tailed
											Sum of ranks in column B,C	40 , 15
											Mann-Whitney U	0
											Difference between medians
											Median of column B	2.450, n=5
											Median of column C	0.000, n=5
											Difference: Actual	-2.45
											Difference: Hodges-Lehmann	-2.45
