# Supplementary material for: Distinct signals and immune cells drive liver pathology and glomerulonephritis in ABIN1[D485N] mice
Source: Life Sci Alliance. 2019 Nov 6;2(6):e201900533. doi: 10.26508/lsa.201900533 (PMC6836709; doi:10.26508/lsa.201900533)
Supplement: Supplementary file 3 [file LSA-2019-00533_SdataF3.xlsx]

## Sheet: 3A Spleen size
DATA SET Spleen size					Shapiro-Wilk normality test report						Ordinary one-way ANOVA							Tukey's multiple comparisons test
WT	ABIN1	TLR7	ABIN1xTLR7			WT	ABIN1	TLR7	ABIN1xTLR7		Table Analyzed	Spleen weight						Number of families	1
0.0671	0.4438	0.0795	0.0742		Shapiro-Wilk normality test						Data sets analyzed	A : WT	B : ABIN1	C : TLR7	D : ABIN1xTLR7			Number of comparisons per family	6
0.0758	0.3559	0.0925	0.1005		W	0.9373	0.9489	0.8994	0.872									Alpha	0.05
0.0768	0.3926	0.0894	0.0862		P value	0.6146	0.7291	0.3272	0.1056		ANOVA summary
0.0896	0.395	0.0912	0.0965		Passed normality test (alpha=0.05)?	Yes	Yes	Yes	Yes		F	242.7						Tukey's multiple comparisons test	Mean Diff.	95.00% CI of diff.	Significant?	Summary	Adjusted P Value
0.0798	0.4909	0.05	0.1023		P value summary	ns	ns	ns	ns		P value	<0.0001
0.0768		0.07	0.076		Number of values	7	5	7	10		P value summary	****						WT vs. ABIN1	-0.3388	-0.3792 to -0.2983	Yes	****	<0.0001	A-B
0.0723		0.06	0.0796								Significant diff. among means (P < 0.05)?	Yes						WT vs. TLR7	0.0008	-0.0361 to 0.0377	No	ns	>0.9999	A-C
			0.1327								R square	0.9668						WT vs. ABIN1xTLR7	-0.01591	-0.04994 to 0.01811	No	ns	0.5797	A-D
			0.08															ABIN1 vs. TLR7	0.3396	0.2991 to 0.38	Yes	****	<0.0001	B-C
			0.1								Brown-Forsythe test							ABIN1 vs. ABIN1xTLR7	0.3228	0.285 to 0.3607	Yes	****	<0.0001	B-D
											F (DFn, DFd)	3.505 (3, 25)						TLR7 vs. ABIN1xTLR7	-0.01671	-0.05074 to 0.01731	No	ns	0.5403	C-D
											P value	0.03
											P value summary	*
											Are SDs significantly different (P < 0.05)?	Yes						Test details	Mean 1	Mean 2	Mean Diff.	SE of diff.	n1	n2	q	DF
											Bartlett's test							WT vs. ABIN1	0.07689	0.4156	-0.3388	0.0147	7	5	32.6	25
											Bartlett's statistic (corrected)	19.37						WT vs. TLR7	0.07689	0.07609	0.0008	0.01342	7	7	0.08433	25
											P value	0.0002						WT vs. ABIN1xTLR7	0.07689	0.0928	-0.01591	0.01237	7	10	1.819	25
											P value summary	***						ABIN1 vs. TLR7	0.4156	0.07609	0.3396	0.0147	5	7	32.67	25
											Are SDs significantly different (P < 0.05)?	Yes						ABIN1 vs. ABIN1xTLR7	0.4156	0.0928	0.3228	0.01375	5	10	33.21	25
																		TLR7 vs. ABIN1xTLR7	0.07609	0.0928	-0.01671	0.01237	7	10	1.911	25
											ANOVA table	SS	DF	MS	F (DFn, DFd)	P value
											Treatment (between columns)	0.4586	3	0.1529	F (3, 25) = 242.7	P<0.0001
											Residual (within columns)	0.01575	25	0.00063
											Total	0.4744	28
											Data summary
											Number of treatments (columns)	4
											Number of values (total)	29

## Sheet: 3B Tf cells
DATA SET Tfh cells					Shapiro-Wilk normality test report						Ordinary one-way ANOVA							Tukey's multiple comparisons test
WT	ABIN1	TLR7	ABIN1xTLR7			WT	ABIN1	TLR7	ABIN1xTLR7		Table Analyzed	Tfh cells						Number of families	1
0.08358	0.26445	0.027945	0.16537		Shapiro-Wilk normality test						Data sets analyzed	A : WT	B : ABIN1	C : TLR7	D : ABIN1xTLR7			Number of comparisons per family	6
0.22008	0.3927	0.1269	0.16872		W	0.9688	0.9191	0.9246	0.8939									Alpha	0.05
0.14976	0.9306	0.096	0.0792		P value	0.8894	0.524	0.5058	0.1876		ANOVA summary
0.31512	0.777	0.1027	0.10305		Passed normality test (alpha=0.05)?	Yes	Yes	Yes	Yes		F	20.46						Tukey's multiple comparisons test	Mean Diff.	95.00% CI of diff.	Significant?	Summary	Adjusted P Value
0.1712	0.7332	0.0812	0.28305		P value summary	ns	ns	ns	ns		P value	<0.0001
0.1897		0.1462	0.11403		Number of values	7	5	7	10		P value summary	****						WT vs. ABIN1	-0.4276	-0.6296 to -0.2255	Yes	****	<0.0001	A-B
0.2148		0.0305	0.1062								Significant diff. among means (P < 0.05)?	Yes						WT vs. TLR7	0.1047	-0.07974 to 0.2891	No	ns	0.4179	A-C
			0.16786								R square	0.7106						WT vs. ABIN1xTLR7	0.03583	-0.1342 to 0.2059	No	ns	0.9373	A-D
			0.1268															ABIN1 vs. TLR7	0.5322	0.3302 to 0.7343	Yes	****	<0.0001	B-C
			0.2478								Brown-Forsythe test							ABIN1 vs. ABIN1xTLR7	0.4634	0.2744 to 0.6524	Yes	****	<0.0001	B-D
											F (DFn, DFd)	5.033 (3, 25)						TLR7 vs. ABIN1xTLR7	-0.06886	-0.2389 to 0.1012	No	ns	0.6845	C-D
											P value	0.0073
											P value summary	**
											Are SDs significantly different (P < 0.05)?	Yes						Test details	Mean 1	Mean 2	Mean Diff.	SE of diff.	n1	n2	q	DF
											Bartlett's test							WT vs. ABIN1	0.192	0.6196	-0.4276	0.07345	7	5	8.232	25
											Bartlett's statistic (corrected)	22.71						WT vs. TLR7	0.192	0.08735	0.1047	0.06705	7	7	2.208	25
											P value	<0.0001						WT vs. ABIN1xTLR7	0.192	0.1562	0.03583	0.06182	7	10	0.8196	25
											P value summary	****						ABIN1 vs. TLR7	0.6196	0.08735	0.5322	0.07345	5	7	10.25	25
											Are SDs significantly different (P < 0.05)?	Yes						ABIN1 vs. ABIN1xTLR7	0.6196	0.1562	0.4634	0.0687	5	10	9.538	25
																		TLR7 vs. ABIN1xTLR7	0.08735	0.1562	-0.06886	0.06182	7	10	1.575	25
											ANOVA table	SS	DF	MS	F (DFn, DFd)	P value
											Treatment (between columns)	0.9658	3	0.3219	F (3, 25) = 20.46	P<0.0001
											Residual (within columns)	0.3934	25	0.01573
											Total	1.359	28
											Data summary
											Number of treatments (columns)	4
											Number of values (total)	29

## Sheet: 3C GCB cells
DATA SET GCB cells					Shapiro-Wilk normality test report						Kruskal-Wallis test			Mann-Whitney test (WT vs. ABIN1 comparison)
WT	ABIN1	TLR7	ABIN1xTLR7		Shapiro-Wilk normality test						Table Analyzed	Germinal centre B cells		Table Analyzed	Germinal centre B cells
0.06567	0.516	0.004813	0.13661		W	0.8039	0.8129	0.8101	0.9594
0.41658	0.7259	0.070218	0.0888		P value	0.0448	0.1028	0.0515	0.7788		Kruskal-Wallis test			Column B	ABIN1
0.11856	0.9306	0.04288	0.04248		Passed normality test (alpha=0.05)?	No	Yes	Yes	Yes		P value	0.0002		vs.	vs.
0.26664	0.945	0.01817	0.056334		P value summary	*	ns	ns	ns		Exact or approximate P value?	Approximate		Column A	WT
0.10165	0.9588	0.0045	0.14535		Number of values	7	5	7	10		P value summary	***
0.1084		0.019	0.10317								Do the medians vary signif. (P < 0.05)?	Yes		Mann Whitney test
0.049404		0.0049	0.082305								Number of groups	4		P value	0.0025
			0.09156								Kruskal-Wallis statistic	19.57		Exact or approximate P value?	Exact
			0.0423											P value summary	**
			0.0168								Data summary			Significantly different (P < 0.05)?	Yes
											Number of treatments (columns)	4		One- or two-tailed P value?	Two-tailed
											Number of values (total)	29		Sum of ranks in column A,B	28 , 50
														Mann-Whitney U	0
														Difference between medians
														Median of column A	0.1084, n=7
														Median of column B	0.9306, n=5
														Difference: Actual	0.8222
														Difference: Hodges-Lehmann	0.6765
														Mann-Whitney test ( ABIN1 vs TLR7 comparison)
														Table Analyzed	Germinal centre B cells
														Column C	TLR7
														vs.	vs.
														Column B	ABIN1
														Mann Whitney test
														P value	0.0025
														Exact or approximate P value?	Exact
														P value summary	**
														Significantly different (P < 0.05)?	Yes
														One- or two-tailed P value?	Two-tailed
														Sum of ranks in column B,C	50 , 28
														Mann-Whitney U	0
														Difference between medians
														Median of column B	0.9306, n=5
														Median of column C	0.01817, n=7
														Difference: Actual	-0.9124
														Difference: Hodges-Lehmann	-0.8886
														Mann-Whitney test ( ABIN1 vs ABIN1xTLR7 comparison)
														Table Analyzed	Germinal centre B cells
														Column D	ABIN1xTLR7
														vs.	vs.
														Column B	ABIN1
														Mann Whitney test
														P value	0.0007
														Exact or approximate P value?	Exact
														P value summary	***
														Significantly different (P < 0.05)?	Yes
														One- or two-tailed P value?	Two-tailed
														Sum of ranks in column B,D	65 , 55
														Mann-Whitney U	0
														Difference between medians
														Median of column B	0.9306, n=5
														Median of column D	0.08555, n=10
														Difference: Actual	-0.845
														Difference: Hodges-Lehmann	-0.8178

## Sheet: 3D anti-dsDNA
DATA SET anti-dsDNA					Shapiro-Wilk normality test report						Kruskal-Wallis test			Mann-Whitney test (WT vs. ABIN1 comparison)
WT	ABIN1[D485N]	TLR7 KO	ABIN1[D485N]xTLR7 KO			WT	ABIN1[D485N]	TLR7 KO	ABIN1[D485N]xTLR7 KO		Table Analyzed	anti-dsDNA		Table Analyzed	anti-dsDNA
9.69931	50.1772	9.86644	20.4983		Shapiro-Wilk normality test
13.6395	35.1569	13.3435	11.7936		W	0.8854	0.6407	0.9251	0.9608		Kruskal-Wallis test			Column B	ABIN1[D485N]
24.3603	36.1208	7.33764	19.0023		P value	0.295	0.0014	0.473	0.7811		P value	<0.0001		vs.	vs.
9.36448	37.9687	5.79341	13.3106		Passed normality test (alpha=0.05)?	Yes	No	Yes	Yes		Exact or approximate P value?	Approximate		Column A	WT
17.1216	120.551	9.26389	16.99		P value summary	ns	**	ns	ns		P value summary	****
12.7179	32.387	9.06248	17.3519		Number of values	6	6	8	11		Do the medians vary signif. (P < 0.05)?	Yes		Mann Whitney test
		8.92804	15.7414								Number of groups	4		P value	0.0022
		7.4398	16.5626								Kruskal-Wallis statistic	22.46		Exact or approximate P value?	Exact
			10.7993											P value summary	**
			15.4459								Data summary			Significantly different (P < 0.05)?	Yes
			16.464								Number of treatments (columns)	4		One- or two-tailed P value?	Two-tailed
											Number of values (total)	31		Sum of ranks in column A,B	21 , 57
														Mann-Whitney U	0
														Difference between medians
														Median of column A	13.18, n=6
														Median of column B	37.04, n=6
														Difference: Actual	23.87
														Difference: Hodges-Lehmann	25.35
														Mann-Whitney test ( ABIN1 vs TLR7 comparison)
														Table Analyzed	anti-dsDNA
														Column C	TLR7 KO
														vs.	vs.
														Column B	ABIN1[D485N]
														Mann Whitney test
														P value	0.0007
														Exact or approximate P value?	Exact
														P value summary	***
														Significantly different (P < 0.05)?	Yes
														One- or two-tailed P value?	Two-tailed
														Sum of ranks in column B,C	69 , 36
														Mann-Whitney U	0
														Difference between medians
														Median of column B	37.04, n=6
														Median of column C	8.995, n=8
														Difference: Actual	-28.05
														Difference: Hodges-Lehmann	-28.74
														Mann-Whitney test ( ABIN1 vs ABIN1xTLR7 comparison)
														Table Analyzed	anti-dsDNA
														Column D	ABIN1[D485N]xTLR7 KO
														vs.	vs.
														Column B	ABIN1[D485N]
														Mann Whitney test
														P value	0.0002
														Exact or approximate P value?	Exact
														P value summary	***
														Significantly different (P < 0.05)?	Yes
														One- or two-tailed P value?	Two-tailed
														Sum of ranks in column B,D	87 , 66
														Mann-Whitney U	0
														Difference between medians
														Median of column B	37.04, n=6
														Median of column D	16.46, n=11
														Difference: Actual	-20.58
														Difference: Hodges-Lehmann	-21.72

## Sheet: 3E IgM
DATA SET IgM					Shapiro-Wilk normality test report						Kruskal-Wallis test				Mann-Whitney test (WT vs. ABIN1 comparison)
WT	ABIN1[D485N]	TLR7 KO	ABIN1[D485N]xTLR7 KO			WT	ABIN1[D485N]	TLR7 KO	ABIN1[D485N]xTLR7 KO		Table Analyzed	IgM			Table Analyzed	IgM
2.54701	39.0838	1.00037	2.79052		Shapiro-Wilk normality test
5.94825	22.5261	0.805395	2.31968		W	0.7597	0.9301	0.954	0.902		Kruskal-Wallis test				Column B	ABIN1[D485N]
1.32822	4.4942	0.661301	2.49931		P value	0.0248	0.5812	0.7663	0.2304		P value	<0.0001			vs.	vs.
1.84159	25.0418	0.788752	1.87143		Passed normality test (alpha=0.05)?	No	Yes	Yes	Yes		Exact or approximate P value?	Approximate			Column A	WT
2.52315	5.42516	0.583038	1.58416		P value summary	*	ns	ns	ns		P value summary	****
2.25225	13.2237	0.851875	2.65642		Number of values	6	6	7	10		Do the medians vary signif. (P < 0.05)?	Yes			Mann Whitney test
		0.644374	2.96023								Number of groups	4			P value	0.0087
			2.9116								Kruskal-Wallis statistic	22.09			Exact or approximate P value?	Exact
			1.83496												P value summary	**
			1.79524								Data summary				Significantly different (P < 0.05)?	Yes
											Number of treatments (columns)	4			One- or two-tailed P value?	Two-tailed
											Number of values (total)	29			Sum of ranks in column A,B	23 , 55
															Mann-Whitney U	2
															Difference between medians
															Median of column A	2.388, n=6
															Median of column B	17.87, n=6
															Difference: Actual	15.49
															Difference: Hodges-Lehmann	14.24
															Mann-Whitney test ( ABIN1 vs TLR7 comparison)
															Table Analyzed	IgM
															Column C	TLR7 KO
															vs.	vs.
															Column B	ABIN1[D485N]
															Mann Whitney test
															P value	0.0012
															Exact or approximate P value?	Exact
															P value summary	**
															Significantly different (P < 0.05)?	Yes
															One- or two-tailed P value?	Two-tailed
															Sum of ranks in column B,C	63 , 28
															Mann-Whitney U	0
															Difference between medians
															Median of column B	17.87, n=6
															Median of column C	0.7888, n=7
															Difference: Actual	-17.09
															Difference: Hodges-Lehmann	-17.08
															Mann-Whitney test ( ABIN1 vs ABIN1xTLR7 comparison)
															Table Analyzed	IgM
															Column D	ABIN1[D485N]xTLR7 KO
															vs.	vs.
															Column B	ABIN1[D485N]
															Mann Whitney test
															P value	0.0002
															Exact or approximate P value?	Exact
															P value summary	***
															Significantly different (P < 0.05)?	Yes
															One- or two-tailed P value?	Two-tailed
															Sum of ranks in column B,D	81 , 55
															Mann-Whitney U	0
															Difference between medians
															Median of column B	17.87, n=6
															Median of column D	2.409, n=10
															Difference: Actual	-15.47
															Difference: Hodges-Lehmann	-15.6

## Sheet: 3E IgG1
DATA SET IgG1					Shapiro-Wilk normality test report						Ordinary one-way ANOVA							Tukey's multiple comparisons test
WT	ABIN1[D485N]	TLR7 KO	ABIN1[D485N]xTLR7 KO			WT	ABIN1[D485N]	TLR7 KO	ABIN1[D485N]xTLR7 KO		Table Analyzed	Tfh cells						Number of families	1
1.39871	15.8771	1.32827	3.01296		Shapiro-Wilk normality test						Data sets analyzed	A : WT	B : ABIN1	C : TLR7	D : ABIN1xTLR7			Number of comparisons per family	6
2.28467	9.92879	0.916687	2.89391		W	0.8774	0.9425	0.9094	0.9227									Alpha	0.05
1.44246	1.45076	0.697837	3.44523		P value	0.2572	0.6791	0.392	0.4525		ANOVA summary
1.29793	10.3945	1.29676	2.12597		Passed normality test (alpha=0.05)?	Yes	Yes	Yes	Yes		F	20.46						Tukey's multiple comparisons test	Mean Diff.	95.00% CI of diff.	Significant?	Summary	Adjusted P Value
1.77276	16.837	0.828096	3.05873		P value summary	ns	ns	ns	ns		P value	<0.0001
2.5867	5.27711	0.99606	2.721		Number of values	6	6	7	8		P value summary	****						WT vs. ABIN1	-0.4276	-0.6296 to -0.2255	Yes	****	<0.0001	A-B
		0.64576	2.72238								Significant diff. among means (P < 0.05)?	Yes						WT vs. TLR7	0.1047	-0.07974 to 0.2891	No	ns	0.4179	A-C
			3.02724								R square	0.7106						WT vs. ABIN1xTLR7	0.03583	-0.1342 to 0.2059	No	ns	0.9373	A-D
																		ABIN1 vs. TLR7	0.5322	0.3302 to 0.7343	Yes	****	<0.0001	B-C
											Brown-Forsythe test							ABIN1 vs. ABIN1xTLR7	0.4634	0.2744 to 0.6524	Yes	****	<0.0001	B-D
											F (DFn, DFd)	5.033 (3, 25)						TLR7 vs. ABIN1xTLR7	-0.06886	-0.2389 to 0.1012	No	ns	0.6845	C-D
											P value	0.0073
											P value summary	**
											Are SDs significantly different (P < 0.05)?	Yes						Test details	Mean 1	Mean 2	Mean Diff.	SE of diff.	n1	n2	q	DF
											Bartlett's test							WT vs. ABIN1	0.192	0.6196	-0.4276	0.07345	7	5	8.232	25
											Bartlett's statistic (corrected)	22.71						WT vs. TLR7	0.192	0.08735	0.1047	0.06705	7	7	2.208	25
											P value	<0.0001						WT vs. ABIN1xTLR7	0.192	0.1562	0.03583	0.06182	7	10	0.8196	25
											P value summary	****						ABIN1 vs. TLR7	0.6196	0.08735	0.5322	0.07345	5	7	10.25	25
											Are SDs significantly different (P < 0.05)?	Yes						ABIN1 vs. ABIN1xTLR7	0.6196	0.1562	0.4634	0.0687	5	10	9.538	25
																		TLR7 vs. ABIN1xTLR7	0.08735	0.1562	-0.06886	0.06182	7	10	1.575	25
											ANOVA table	SS	DF	MS	F (DFn, DFd)	P value
											Treatment (between columns)	0.9658	3	0.3219	F (3, 25) = 20.46	P<0.0001
											Residual (within columns)	0.3934	25	0.01573
											Total	1.359	28
											Data summary
											Number of treatments (columns)	4
											Number of values (total)	29

## Sheet: 3E IgG2b
DATA SET IgG2b					Shapiro-Wilk normality test report						Kruskal-Wallis test				Mann-Whitney test (WT vs. ABIN1 comparison)
WT	ABIN1[D485N]	TLR7 KO	ABIN1[D485N]xTLR7 KO			WT	ABIN1[D485N]	TLR7 KO	ABIN1[D485N]xTLR7 KO		Table Analyzed	IgG2b			Table Analyzed	IgG2b
2.54701	39.0838	1.00037	2.79052		Shapiro-Wilk normality test
5.94825	22.5261	0.805395	2.31968		W	0.5838	0.9603	0.7707	0.8901		Kruskal-Wallis test				Column B	ABIN1[D485N]
1.32822	4.4942	0.661301	2.49931		P value	0.0003	0.8223	0.0208	0.2346		P value	0.0001			vs.	vs.
1.84159	25.0418	0.788752	1.87143		Passed normality test (alpha=0.05)?	No	Yes	No	Yes		Exact or approximate P value?	Approximate			Column A	WT
2.52315	5.42516	0.583038	1.58416		P value summary	***	ns	*	ns		P value summary	***
2.25225	13.2237	0.851875	2.65642		Number of values	6	6	7	8		Do the medians vary signif. (P < 0.05)?	Yes			Mann Whitney test
		0.644374	2.96023								Number of groups	4			P value	0.026
			2.9116								Kruskal-Wallis statistic	20.28			Exact or approximate P value?	Exact
			1.83496												P value summary	*
			1.79524								Data summary				Significantly different (P < 0.05)?	Yes
											Number of treatments (columns)	4			One- or two-tailed P value?	Two-tailed
											Number of values (total)	27			Sum of ranks in column A,B	25 , 53
															Mann-Whitney U	4
															Difference between medians
															Median of column A	2.087, n=6
															Median of column B	6.643, n=6
															Difference: Actual	4.556
															Difference: Hodges-Lehmann	4.42
															Mann-Whitney test ( ABIN1 vs TLR7 comparison)
															Table Analyzed	IgG2b
															Column C	TLR7 KO
															vs.	vs.
															Column B	ABIN1[D485N]
															Mann Whitney test
															P value	0.0012
															Exact or approximate P value?	Exact
															P value summary	**
															Significantly different (P < 0.05)?	Yes
															One- or two-tailed P value?	Two-tailed
															Sum of ranks in column B,C	63 , 28
															Mann-Whitney U	0
															Difference between medians
															Median of column B	6.643, n=6
															Median of column C	1.081, n=7
															Difference: Actual	-5.562
															Difference: Hodges-Lehmann	-5.637
															Mann-Whitney test ( ABIN1 vs ABIN1xTLR7 comparison)
															Table Analyzed	IgG2b
															Column D	ABIN1[D485N]xTLR7 KO
															vs.	vs.
															Column B	ABIN1[D485N]
															Mann Whitney test
															P value	0.0127
															Exact or approximate P value?	Exact
															P value summary	*
															Significantly different (P < 0.05)?	Yes
															One- or two-tailed P value?	Two-tailed
															Sum of ranks in column B,D	64 , 41
															Mann-Whitney U	5
															Difference between medians
															Median of column B	6.643, n=6
															Median of column D	3.821, n=8
															Difference: Actual	-2.822
															Difference: Hodges-Lehmann	-2.822

## Sheet: 3F IgG2a
DATA SET IgG2a					Shapiro-Wilk normality test report						Ordinary one-way ANOVA							Tukey's multiple comparisons test
WT	ABIN1[D485N]	TLR7 KO	ABIN1[D485N]xTLR7 KO			WT	ABIN1[D485N]	TLR7 KO	ABIN1[D485N]xTLR7 KO		Table Analyzed	IgG2a						Number of families	1
0.0307853	0.14075	0.0136864	0.0199591		Shapiro-Wilk normality test						Data sets analyzed	A : WT	B : ABIN1[D485N]	C : TLR7 KO	D : ABIN1[D485N]xTLR7 KO			Number of comparisons per family	6
0.0597024	0.155713	0.0005964	0.0307853		W	0.9282	0.854	0.964	0.9232									Alpha	0.05
0.0475823	0.0399711	0.0338549	0.0369165		P value	0.5662	0.1695	0.8524	0.384		ANOVA summary
0.0307853	0.0338549	0.0183985	0.0246174		Passed normality test (alpha=0.05)?	Yes	Yes	Yes	Yes		F	12.79						Tukey's multiple comparisons test	Mean Diff.	95.00% CI of diff.	Significant?	Summary	Adjusted P Value
0.0338549	0.103316	0.0414961	0.0369165		P value summary	ns	ns	ns	ns		P value	<0.0001
0.0199591	0.13626	0.0040221	0.0353866		Maximum	0.0597	0.1557	0.0415	0.04302		P value summary	****						WT vs. ABIN1[D485N]	-0.06453	-0.1062 to -0.02282	Yes	**	0.0014	A-B
		0.0261635	0.0152628								Significant diff. among means (P < 0.05)?	Yes						WT vs. TLR7 KO	0.01737	-0.02283 to 0.05756	No	ns	0.6396	A-C
			0.0430196								R square	0.6055						WT vs. ABIN1[D485N]xTLR7 KO	0.007756	-0.02955 to 0.04507	No	ns	0.9396	A-D
			0.0168333															ABIN1[D485N] vs. TLR7 KO	0.0819	0.0417 to 0.1221	Yes	****	<0.0001	B-C
			0.0338549								Brown-Forsythe test							ABIN1[D485N] vs. ABIN1[D485N]xTLR7 KO	0.07229	0.03498 to 0.1096	Yes	****	<0.0001	B-D
											F (DFn, DFd)	6.848 (3, 25)						TLR7 KO vs. ABIN1[D485N]xTLR7 KO	-0.00961	-0.04522 to 0.026	No	ns	0.879	C-D
											P value	0.0016
											P value summary	**
											Are SDs significantly different (P < 0.05)?	Yes						Test details	Mean 1	Mean 2	Mean Diff.	SE of diff.	n1	n2	q	DF
											Bartlett's test							WT vs. ABIN1[D485N]	0.03711	0.1016	-0.06453	0.01517	6	6	6.018	25
											Bartlett's statistic (corrected)	22.37						WT vs. TLR7 KO	0.03711	0.01975	0.01737	0.01461	6	7	1.681	25
											P value	<0.0001						WT vs. ABIN1[D485N]xTLR7 KO	0.03711	0.02936	0.007756	0.01356	6	10	0.8087	25
											P value summary	****						ABIN1[D485N] vs. TLR7 KO	0.1016	0.01975	0.0819	0.01461	6	7	7.926	25
											Are SDs significantly different (P < 0.05)?	Yes						ABIN1[D485N] vs. ABIN1[D485N]xTLR7 KO	0.1016	0.02936	0.07229	0.01356	6	10	7.537	25
																		TLR7 KO vs. ABIN1[D485N]xTLR7 KO	0.01975	0.02936	-0.00961	0.01294	7	10	1.05	25
											ANOVA table	SS	DF	MS	F (DFn, DFd)	P value
											Treatment (between columns)	0.02648	3	0.008827	F (3, 25) = 12.79	P<0.0001
											Residual (within columns)	0.01725	25	0.00069
											Total	0.04373	28
											Data summary
											Number of treatments (columns)	4
											Number of values (total)	29

## Sheet: 3F IgE
DATA SET IgE					Shapiro-Wilk normality test report						Kruskal-Wallis test				Mann-Whitney test (WT vs. ABIN1 comparison)
WT	ABIN1[D485N]	TLR7 KO	ABIN1[D485N]xTLR7 KO			WT	ABIN1[D485N]	TLR7 KO	ABIN1[D485N]xTLR7 KO						Table Analyzed	IgE
0.005267	3.24636	0.00044	0.001503		Shapiro-Wilk normality test						Table Analyzed	IgE
0.000568	8.81657	0.000393	0.002433		W	0.5465	0.7636	0.7311	0.9156						Column B	ABIN1[D485N]
0.058838	0.523191	0.003344	0.007409		P value	<0.0001	0.0176	0.005	0.2513		Kruskal-Wallis test				vs.	vs.
0.000623	0.007835	0.001017	0.002251		Passed normality test (alpha=0.05)?	No	No	No	Yes		P value	0.0003			Column A	WT
0.001097	1.7059	0.000994	0.001455		P value summary	****	*	**	ns		Exact or approximate P value?	Approximate
0.00104	1.75246	0.000382	0.003949		Number of values	7	7	8	12		P value summary	***			Mann Whitney test
0.00681	0.159361	0.002215	0.003095								Do the medians vary signif. (P < 0.05)?	Yes			P value	0.0012
		0.007752	0.005056								Number of groups	4			Exact or approximate P value?	Exact
			0.00322								Kruskal-Wallis statistic	19			P value summary	**
			0.006904												Significantly different (P < 0.05)?	Yes
			0.004408								Data summary				One- or two-tailed P value?	Two-tailed
			0.006783								Number of treatments (columns)	4			Sum of ranks in column A,B	29 , 76
											Number of values (total)	34			Mann-Whitney U	1
															Difference between medians
															Median of column A	0.001097, n=7
															Median of column B	1.706, n=7
															Difference: Actual	1.705
															Difference: Hodges-Lehmann	1.701
															Mann-Whitney test ( ABIN1 vs TLR7 comparison)
															Table Analyzed	IgE
															Column C	TLR7 KO
															vs.	vs.
															Column B	ABIN1[D485N]
															Mann Whitney test
															P value	0.0003
															Exact or approximate P value?	Exact
															P value summary	***
															Significantly different (P < 0.05)?	Yes
															One- or two-tailed P value?	Two-tailed
															Sum of ranks in column B,C	84 , 36
															Mann-Whitney U	0
															Difference between medians
															Median of column B	1.706, n=7
															Median of column C	0.001006, n=8
															Difference: Actual	-1.705
															Difference: Hodges-Lehmann	-1.705
															Mann-Whitney test ( ABIN1 vs ABIN1xTLR7 comparison)
															Table Analyzed	IgE
															Column D	ABIN1[D485N]xTLR7 KO
															vs.	vs.
															Column B	ABIN1[D485N]
															Mann Whitney test
															P value	<0.0001
															Exact or approximate P value?	Exact
															P value summary	****
															Significantly different (P < 0.05)?	Yes
															One- or two-tailed P value?	Two-tailed
															Sum of ranks in column B,D	112 , 78
															Mann-Whitney U	0
															Difference between medians
															Median of column B	1.706, n=7
															Median of column D	0.003585, n=12
															Difference: Actual	-1.702
															Difference: Hodges-Lehmann	-1.702

## Sheet: 3G Glomerulonephritis
DATA SET Kidney					Shapiro-Wilk normality test report						Kruskal-Wallis test				Mann-Whitney test (WT vs. ABIN1 comparison)
WT	ABIN1[D485N]	TLR7 KO	ABIN1[D485N]xTLR7 KO			WT	ABIN1[D485N]	TLR7 KO	ABIN1[D485N]xTLR7 KO		Table Analyzed	Kidney glomerulonephritis			Table Analyzed	Kidney glomerulonephritis
0	1.9	0	0.5		Shapiro-Wilk normality test
0.05	3.05	0	0.25		W	0.6298	0.916	0.6298	0.8395		Kruskal-Wallis test				Column B	ABIN1 KI
0	3.45	0	0.15		P value	0.0012	0.4767	0.0012	0.1292		P value	0.001			vs.	vs.
0	1.05	0.15	0.6		Passed normality test (alpha=0.05)?	No	Yes	No	Yes		Exact or approximate P value?	Approximate			Column A	WT
	3		0.1		P value summary	**	ns	**	ns		P value summary	***
	1.9		0.1		Number of values	4	6	4	6		Do the medians vary signif. (P < 0.05)?	Yes			Mann Whitney test
											Number of groups	4			P value	0.0048
											Kruskal-Wallis statistic	16.4			Exact or approximate P value?	Exact
															P value summary	**
											Data summary				Significantly different (P < 0.05)?	Yes
											Number of treatments (columns)	4			One- or two-tailed P value?	Two-tailed
											Number of values (total)	20			Sum of ranks in column A,B	10 , 45
															Mann-Whitney U	0
															Difference between medians
															Median of column A	0, n=4
															Median of column B	2.45, n=6
															Difference: Actual	2.45
															Difference: Hodges-Lehmann	2.425
															Mann-Whitney test ( ABIN1 vs TLR7 comparison)
															Table Analyzed	Kidney glomerulonephritis
															Column C	TLR7 KO
															vs.	vs.
															Column B	ABIN1 KI
															Mann Whitney test
															P value	0.0048
															Exact or approximate P value?	Exact
															P value summary	**
															Significantly different (P < 0.05)?	Yes
															One- or two-tailed P value?	Two-tailed
															Sum of ranks in column B,C	45 , 10
															Mann-Whitney U	0
															Difference between medians
															Median of column B	2.45, n=6
															Median of column C	0, n=4
															Difference: Actual	-2.45
															Difference: Hodges-Lehmann	-2.375
															Mann-Whitney test ( ABIN1 vs ABIN1xTLR7 comparison)
															Table Analyzed	Kidney glomerulonephritis
															Column D	ABIN1 KIXTLR7 KO
															vs.	vs.
															Column B	ABIN1 KI
															Mann Whitney test
															P value	0.0022
															Exact or approximate P value?	Exact
															P value summary	**
															Significantly different (P < 0.05)?	Yes
															One- or two-tailed P value?	Two-tailed
															Sum of ranks in column B,D	57 , 21
															Mann-Whitney U	0
															Difference between medians
															Median of column B	2.45, n=6
															Median of column D	0.2, n=6
															Difference: Actual	-2.25
															Difference: Hodges-Lehmann	-2.1

[truncated: 2 more sheets: 3H Liver histology, 3I Lungs histology]
