# Supplementary material for: Distinct signals and immune cells drive liver pathology and glomerulonephritis in ABIN1[D485N] mice
Source: Life Sci Alliance. 2019 Nov 6;2(6):e201900533. doi: 10.26508/lsa.201900533 (PMC6836709; doi:10.26508/lsa.201900533)
Supplement: Supplementary file 5 [file LSA-2019-00533_SdataF5.xlsx]

## Sheet: 5D Kidney pMo
RAW data			Shapiro-Wilk test				Mann Whitney test
WT	ABIN1			WT	ABIN1
1.22114	14.8775		Test for normal distribution				Table Analyzed	Kidney Ly6C- 22w
0.499856	6.219		Shapiro-Wilk test
0.933213	22.7716		W	0.9303	0.6651		Column B	ABIN1
0.729251	10.6755		P value	0.4512	0.0003		vs.	vs.
1.0292	10.6908		Passed normality test (alpha=0.05)?	Yes	No		Column A	WT
0.559855	31.9104		P value summary	ns	***
0.54908	3.75066						Mann Whitney test
0.31644	114.256		Number of values	10	10		P value	<0.0001
0.61642	7.0286						Exact or approximate P value?	Exact
0.46332	166.944						P value summary	****
							Significantly different (P < 0.05)?	Yes
							One- or two-tailed P value?	Two-tailed
							Sum of ranks in column A,B	55 , 155
							Mann-Whitney U	0
							Difference between medians
							Median of column A	0.5881, n=10
							Median of column B	12.78, n=10
							Difference: Actual	12.2
							Difference: Hodges-Lehmann	12.02

## Sheet: 5D Liver pMo
RAW DATA			Shapiro-Wilk test				Unpaired t test with Welch's correction
WT	ABIN1			WT	ABIN1
0.0098126	2.64335		Test for normal distribution				Table Analyzed	Liver pMo
0.016716	0.827925		Shapiro-Wilk test
0.04392	1.24293		W	0.8777	0.9232		Column B	ABIN1
0.0171	3.32925		P value	0.2991	0.5551		vs.	vs.
0.02448			Passed normality test (alpha=0.05)?	Yes	Yes		Column A	WT
			P value summary	ns	ns
							Unpaired t test with Welch's correction
			Number of values	5	4		P value	0.0427
							P value summary	*
							Significantly different (P < 0.05)?	Yes
							One- or two-tailed P value?	Two-tailed
							Welch-corrected t, df	t=3.390, df=3.001
							How big is the difference?
							Mean of column A	0.02241
							Mean of column B	2.011
							Difference between means (B - A) ± SEM	1.988 ± 0.5865
							95% confidence interval	0.1222 to 3.855
							R squared (eta squared)	0.793
							F test to compare variances
							F, DFn, Dfd	8019, 3, 4
							P value	<0.0001
							P value summary	****
							Significantly different (P < 0.05)?	Yes
							Data analyzed
							Sample size, column A	5
							Sample size, column B	4

## Sheet: 5D Lungs pMo
RAW DATA			Shapiro-Wilk test				Mann Whitney test
WT	ABIN1			WT	ABIN1
0.944625	4.96547		Test for normal distribution				Table Analyzed	Lung Ly6C- 22w
0.421184	3.97704		Shapiro-Wilk test
0.046705	9.62193		W	0.6322	0.9164		Column B	ABIN1
0.194218	1.27528		P value	<0.0001	0.3279		vs.	vs.
0.1377	3.25995		Passed normality test (alpha=0.05)?	No	Yes		Column A	WT
0.10126	6.72375		P value summary	****	ns
0.08404	1.31546						Mann Whitney test
0.12005	8.9043		Number of values	11	10		P value	<0.0001
0.140965	3.5496						Exact or approximate P value?	Exact
0.060435	10.4302						P value summary	****
0.04642							Significantly different (P < 0.05)?	Yes
							One- or two-tailed P value?	Two-tailed
							Sum of ranks in column A,B	66 , 165
							Mann-Whitney U	0
							Difference between medians
							Median of column A	0.1201, n=11
							Median of column B	4.471, n=10
							Difference: Actual	4.351
							Difference: Hodges-Lehmann	3.976

## Sheet: 5E Kidney iMo
RAW DATA			Shapiro-Wilk test				Unpaired t test with Welch's correction
WT	ABIN1			WT	ABIN1		Table Analyzed	Kidney Ly6C+ 22w
1.20652	1.54435		Test for normal distribution
0.421447	0.909529		Shapiro-Wilk test				Column B	ABIN1
0.802236	1.21324		W	0.8795	0.8577		vs.	vs.
0.550294	1.13533		P value	0.1288	0.0717		Column A	WT
1.4384	2.18772		Passed normality test (alpha=0.05)?	Yes	Yes
0.787296	4.53726		P value summary	ns	ns		Unpaired t test with Welch's correction
0.143948	0.197784						P value	0.0358
0.1465	1.4861		Number of values	10	10		P value summary	*
0.161602	0.37064						Significantly different (P < 0.05)?	Yes
0.2145	2.1714						One- or two-tailed P value?	Two-tailed
							Welch-corrected t, df	t=2.376, df=11.50
							How big is the difference?
							Mean of column A	0.5873
							Mean of column B	1.575
							Difference between means (B - A) ± SEM	0.9881 ± 0.4158
							95% confidence interval	0.07767 to 1.898
							R squared (eta squared)	0.3292
							F test to compare variances
							F, DFn, Dfd	7.047, 9, 9
							P value	0.0077
							P value summary	**
							Significantly different (P < 0.05)?	Yes
							Data analyzed
							Sample size, column A	10
							Sample size, column B	10

## Sheet: 5E Liver iMo
RAW DATA			Shapiro-Wilk test				Unpaired t test with Welch's correction
WT	ABIN1			WT	ABIN1		Table Analyzed	Liver iMo 20w
0.103831	1.13967		Test for normal distribution
0.178304	1.48155		Shapiro-Wilk test				Column B	ABIN1
0.21777	1.44958		W	0.8533	0.8013		vs.	vs.
0.118275	2.83475		P value	0.2052	0.1045		Column A	WT
0.41004			Passed normality test (alpha=0.05)?	Yes	Yes
			P value summary	ns	ns		Unpaired t test with Welch's correction
							P value	0.0261
			Number of values	5	4		P value summary	*
							Significantly different (P < 0.05)?	Yes
							One- or two-tailed P value?	Two-tailed
							Welch-corrected t, df	t=3.987, df=3.128
							How big is the difference?
							Mean of column A	0.2056
							Mean of column B	1.726
							Difference between means (B - A) ± SEM	1.521 ± 0.3814
							95% confidence interval	0.3346 to 2.707
							R squared (eta squared)	0.8356
							F test to compare variances
							F, DFn, Dfd	37.56, 3, 4
							P value	0.0044
							P value summary	**
							Significantly different (P < 0.05)?	Yes
							Data analyzed
							Sample size, column A	5
							Sample size, column B	4

## Sheet: 5E Lungs iMo
RAW DATA			Shapiro-Wilk test				Mann Whitney test
WT	ABIN1			WT	ABIN1		Table Analyzed	Lung Ly6C+ 22w
1.15735	0.779136		Test for normal distribution
0.324184	1.41406		Shapiro-Wilk test				Column B	ABIN1
0.040188	1.12056		W	0.738	0.9148		vs.	vs.
0.211874	0.311735		P value	0.0015	0.3159		Column A	WT
0.5427	1.36424		Passed normality test (alpha=0.05)?	No	Yes
0.32038	2.445		P value summary	**	ns		Mann Whitney test
0.216785	0.74898						P value	0.0015
0.339325	0.90249		Number of values	11	10		Exact or approximate P value?	Exact
0.32154	0.53856						P value summary	**
0.15642	1.27776						Significantly different (P < 0.05)?	Yes
0.22577							One- or two-tailed P value?	Two-tailed
							Sum of ranks in column A,B	78 , 153
							Mann-Whitney U	12
							Difference between medians
							Median of column A	0.3204, n=11
							Median of column B	1.012, n=10
							Difference: Actual	0.6911
							Difference: Hodges-Lehmann	0.6882
