# Supplementary material for: Distinct signals and immune cells drive liver pathology and glomerulonephritis in ABIN1[D485N] mice
Source: Life Sci Alliance. 2019 Nov 6;2(6):e201900533. doi: 10.26508/lsa.201900533 (PMC6836709; doi:10.26508/lsa.201900533)
Supplement: Supplementary file 6 [file LSA-2019-00533_SdataF6.xlsx]

## Sheet: 6A blood pMo
DATA SET Blood % pMo							Shapiro-Wilk normality test								One-way ANOVA								Tukey's multiple comparison test
WT	ABIN1	ABIN1xTLR7	ABIN1xMyD88	ABIN1xIRAK4	ABIN1xIRAK1			WT	ABIN1	ABIN1xTLR7	ABIN1xMyD88	ABIN1xIRAK4	ABIN1xIRAK1		Table Analyzed	Transform of Blood Ly6C- %							Number of families	1
3.09	39.8	15.7	2.13	4.5	3.64		Shapiro-Wilk normality test								Data sets analyzed	A : WT	B : ABIN1	C : ABIN1xTLR7	D : ABIN1xMyD88	E : ABIN1xIRAK4			Number of comparisons per family	15
2.44	27.6	11	4.35	2.94	7.79		W	0.9417	0.954	0.9716	0.958	0.9401	0.8212										Alpha	0.05
4.11	49	7.66	2.86	6.56	6.89		P value	0.3394	0.7344	0.908	0.7906	0.6664	0.1193		ANOVA summary
2.36	31.6	8.92	1.62	5.12	6.23		Passed normality test (alpha=0.05)?	Yes	Yes	Yes	Yes	Yes	Yes		F	137							Tukey's multiple comparisons test	Mean Diff.	95.00% CI of diff.	Significant?	Summary	Adjusted P Value
4.17	45.9	13.5	1.77	2.66	7.59		P value summary	ns	ns	ns	ns	ns	ns		P value	<0.0001
2.28	54.7	6.29	3.18				Number of values	17	9	9	8	5	5		P value summary	****							WT vs. ABIN1	-0.518	-0.581 to -0.454	Yes	****	<0.0001	A-B
2.16	27.8	10.5	2.88												Significant diff. among means (P < 0.05)?	Yes							WT vs. ABIN1xTLR7	-0.161	-0.225 to -0.0983	Yes	****	<0.0001	A-C
1.62	42.6	8.02	3.65												R square	0.936							WT vs. ABIN1xMyD88	-0.00511	-0.0707 to 0.0605	No	ns	>0.9999	A-D
1.29	37.2	10.3																					WT vs. ABIN1xIRAK4	-0.0463	-0.124 to 0.0315	No	ns	0.4957	A-E
3.83															Brown-Forsythe test								WT vs. ABIN1xIRAK1	-0.0933	-0.171 to -0.0154	Yes	*	0.0106	A-F
2.55															F (DFn, DFd)	5.07 (5, 47)							ABIN1 vs. ABIN1xTLR7	0.356	0.284 to 0.428	Yes	****	<0.0001	B-C
1.86															P value	0.0009							ABIN1 vs. ABIN1xMyD88	0.512	0.438 to 0.587	Yes	****	<0.0001	B-D
2.23															P value summary	***							ABIN1 vs. ABIN1xIRAK4	0.471	0.386 to 0.557	Yes	****	<0.0001	B-E
1.71															Are SDs significantly different (P < 0.05)?	Yes							ABIN1 vs. ABIN1xIRAK1	0.424	0.339 to 0.51	Yes	****	<0.0001	B-F
2.83																							ABIN1xTLR7 vs. ABIN1xMyD88	0.156	0.082 to 0.231	Yes	****	<0.0001	C-D
2.45															Bartlett's test								ABIN1xTLR7 vs. ABIN1xIRAK4	0.115	0.0297 to 0.2	Yes	**	0.0028	C-E
3.91															Bartlett's statistic (corrected)	22.4							ABIN1xTLR7 vs. ABIN1xIRAK1	0.0682	-0.0172 to 0.154	No	ns	0.1871	C-F
															P value	0.0004							ABIN1xMyD88 vs. ABIN1xIRAK4	-0.0412	-0.128 to 0.046	No	ns	0.7247	D-E
															P value summary	***							ABIN1xMyD88 vs. ABIN1xIRAK1	-0.0882	-0.175 to -0.000902	Yes	*	0.0464	D-F
DATA SET Blood pMo arcsin(sqrt(6)) transformation															Are SDs significantly different (P < 0.05)?	Yes							ABIN1xIRAK4 vs. ABIN1xIRAK1	-0.0469	-0.144 to 0.0499	No	ns	0.7028	E-F
WT	ABIN1	ABIN1xTLR7	ABIN1xMyD88	ABIN1xIRAK4	ABIN1xIRAK1
0.176702	0.682677	0.40741	0.146468	0.213756	0.191965										ANOVA table	SS	DF	MS	F (DFn, DFd)	P value
0.156847	0.553135	0.338065	0.210109	0.172316	0.282863										Treatment (between columns)	1.81	5	0.363	F (5, 47) = 137	P<0.0001			Test details	Mean 1	Mean 2	Mean Diff.	SE of diff.	n1	n2	q	DF
0.204146	0.775397	0.280428	0.169932	0.259011	0.2656										Residual (within columns)	0.125	47	0.00266
0.154234	0.59697	0.303292	0.127625	0.228251	0.252267										Total	1.94	52						WT vs. ABIN1	0.161	0.679	-0.518	0.0212	17	9	34.5	47
0.205652	0.744352	0.376237	0.133437	0.163827	0.279109																		WT vs. ABIN1xTLR7	0.161	0.323	-0.161	0.0212	17	9	10.7	47
0.151576	0.832468	0.253505	0.179284												Data summary								WT vs. ABIN1xMyD88	0.161	0.166	-0.00511	0.0221	17	8	0.327	47
0.147504	0.555369	0.329994	0.170531												Number of treatments (columns)	6							WT vs. ABIN1xIRAK4	0.161	0.207	-0.0463	0.0262	17	5	2.5	47
0.127625	0.711125	0.287125	0.192231												Number of values (total)	53							WT vs. ABIN1xIRAK1	0.161	0.254	-0.0933	0.0262	17	5	5.03	47
0.113824	0.655957	0.326718																					ABIN1 vs. ABIN1xTLR7	0.679	0.323	0.356	0.0243	9	9	20.7	47
0.196975																							ABIN1 vs. ABIN1xMyD88	0.679	0.166	0.512	0.025	9	8	28.9	47
0.160374																							ABIN1 vs. ABIN1xIRAK4	0.679	0.207	0.471	0.0287	9	5	23.2	47
0.136808																							ABIN1 vs. ABIN1xIRAK1	0.679	0.254	0.424	0.0287	9	5	20.9	47
0.149893																							ABIN1xTLR7 vs. ABIN1xMyD88	0.323	0.166	0.156	0.025	9	8	8.83	47
0.131143																							ABIN1xTLR7 vs. ABIN1xIRAK4	0.323	0.207	0.115	0.0287	9	5	5.66	47
0.16903																							ABIN1xTLR7 vs. ABIN1xIRAK1	0.323	0.254	0.0682	0.0287	9	5	3.35	47
0.157171																							ABIN1xMyD88 vs. ABIN1xIRAK4	0.166	0.207	-0.0412	0.0294	8	5	1.98	47
0.199049																							ABIN1xMyD88 vs. ABIN1xIRAK1	0.166	0.254	-0.0882	0.0294	8	5	4.24	47
																							ABIN1xIRAK4 vs. ABIN1xIRAK1	0.207	0.254	-0.0469	0.0326	5	5	2.04	47

## Sheet: 6B sp pMo
DATA SET pMo in spleen							Shapiro-Wilk normality test								One-way ANOVA								Tukey's multiple comparison test
WT	ABIN1	ABIN1xTLR7	ABIN1xMyD88	ABIN1xIRAK4	ABIN1xIRAK1			WT	ABIN1	ABIN1xTLR7	ABIN1xMyD88	ABIN1xIRAK4	ABIN1xIRAK1		Table Analyzed	Spleen Ly6C-							Number of families	1
0.148547	1.28352	0.48173	0.1272	0.2009	0.34782		Shapiro-Wilk normality test								Data sets analyzed	A : WT	B : ABIN1	C : ABIN1xTLR7	D : ABIN1xMyD88	E : ABIN1xIRAK4			Number of comparisons per family	15
0.132712	3.54577	0.82584	0.16275	0.2544	0.66402		W	0.9385	0.8932	0.8719	0.9065	0.9852	0.9375										Alpha	0.05
0.25389	1.3545	0.5184	0.224357	0.344999	0.363351		P value	0.301	0.2507	0.1289	0.292	0.9606	0.6484		ANOVA summary
0.25785	3.1992	0.52899	0.086492	0.23552	0.14105		Passed normality test (alpha=0.05)?	Yes	Yes	Yes	Yes	Yes	Yes		F	50.7							Tukey's multiple comparisons test	Mean Diff.	95.00% CI of diff.	Significant?	Summary	Adjusted P Value
0.29148	3.2412	0.54315	0.0815	0.1276	0.99		P value summary	ns	ns	ns	ns	ns	ns		P value	<0.0001
0.28608		0.39639	0.134389				Number of values	17	8	9	9	5	5		P value summary	****							WT vs. ABIN1	-2.28	-2.75 to -1.82	Yes	****	<0.0001	A-B
0.1749	1.8088	0.4956	0.225046												Significant diff. among means (P < 0.05)?	Yes							WT vs. ABIN1xTLR7	-0.304	-0.75 to 0.142	No	ns	0.3441	A-C
0.19616	2.679	0.19328	0.14553												R square	0.843							WT vs. ABIN1xMyD88	0.0442	-0.402 to 0.49	No	ns	0.9997	A-D
0.1995	2.6985	0.48559	0.14612																				WT vs. ABIN1xIRAK4	-0.0403	-0.591 to 0.51	No	ns	>0.9999	A-E
0.18569															Brown-Forsythe test								WT vs. ABIN1xIRAK1	-0.309	-0.86 to 0.242	No	ns	0.5603	A-F
0.09223															F (DFn, DFd)	10.7 (5, 47)							ABIN1 vs. ABIN1xTLR7	1.98	1.45 to 2.51	Yes	****	<0.0001	B-C
0.16416															P value	<0.0001							ABIN1 vs. ABIN1xMyD88	2.33	1.8 to 2.85	Yes	****	<0.0001	B-D
0.23688															P value summary	****							ABIN1 vs. ABIN1xIRAK4	2.24	1.63 to 2.86	Yes	****	<0.0001	B-E
0.27664															Are SDs significantly different (P < 0.05)?	Yes							ABIN1 vs. ABIN1xIRAK1	1.98	1.36 to 2.59	Yes	****	<0.0001	B-F
0.08955																							ABIN1xTLR7 vs. ABIN1xMyD88	0.348	-0.162 to 0.859	No	ns	0.3424	C-D
0.1965															Bartlett's test								ABIN1xTLR7 vs. ABIN1xIRAK4	0.264	-0.34 to 0.868	No	ns	0.7845	C-E
0.08736															Bartlett's statistic (corrected)	92.7							ABIN1xTLR7 vs. ABIN1xIRAK1	-0.0047	-0.608 to 0.599	No	ns	>0.9999	C-F
															P value	<0.0001							ABIN1xMyD88 vs. ABIN1xIRAK4	-0.0845	-0.688 to 0.519	No	ns	0.9983	D-E
															P value summary	****							ABIN1xMyD88 vs. ABIN1xIRAK1	-0.353	-0.957 to 0.251	No	ns	0.515	D-F
															Are SDs significantly different (P < 0.05)?	Yes							ABIN1xIRAK4 vs. ABIN1xIRAK1	-0.269	-0.953 to 0.416	No	ns	0.8508	E-F
															ANOVA table	SS	DF	MS	F (DFn, DFd)	P value
															Treatment (between columns)	33.6	5	6.73	F (5, 47) = 50.7	P<0.0001			Test details	Mean 1	Mean 2	Mean Diff.	SE of diff.	n1	n2	q	DF
															Residual (within columns)	6.24	47	0.133
															Total	39.9	52						WT vs. ABIN1	0.192	2.48	-2.28	0.156	17	8	20.7	47
																							WT vs. ABIN1xTLR7	0.192	0.497	-0.304	0.15	17	9	2.86	47
															Data summary								WT vs. ABIN1xMyD88	0.192	0.148	0.0442	0.15	17	9	0.416	47
															Number of treatments (columns)	6							WT vs. ABIN1xIRAK4	0.192	0.233	-0.0403	0.185	17	5	0.308	47
															Number of values (total)	53							WT vs. ABIN1xIRAK1	0.192	0.501	-0.309	0.185	17	5	2.36	47
																							ABIN1 vs. ABIN1xTLR7	2.48	0.497	1.98	0.177	8	9	15.8	47
																							ABIN1 vs. ABIN1xMyD88	2.48	0.148	2.33	0.177	8	9	18.6	47
																							ABIN1 vs. ABIN1xIRAK4	2.48	0.233	2.24	0.208	8	5	15.3	47
																							ABIN1 vs. ABIN1xIRAK1	2.48	0.501	1.98	0.208	8	5	13.4	47
																							ABIN1xTLR7 vs. ABIN1xMyD88	0.497	0.148	0.348	0.172	9	9	2.87	47
																							ABIN1xTLR7 vs. ABIN1xIRAK4	0.497	0.233	0.264	0.203	9	5	1.84	47
																							ABIN1xTLR7 vs. ABIN1xIRAK1	0.497	0.501	-0.0047	0.203	9	5	0.0327	47
																							ABIN1xMyD88 vs. ABIN1xIRAK4	0.148	0.233	-0.0845	0.203	9	5	0.588	47
																							ABIN1xMyD88 vs. ABIN1xIRAK1	0.148	0.501	-0.353	0.203	9	5	2.46	47
																							ABIN1xIRAK4 vs. ABIN1xIRAK1	0.233	0.501	-0.269	0.23	5	5	1.65	47

## Sheet: 6C blood iMo
DATA SET Blood % pMo							Shapiro-Wilk normality test								One-way ANOVA								Tukey's multiple comparison test
WT	ABIN1	ABIN1xTLR7	ABIN1xMyD88	ABIN1xIRAK4	ABIN1xIRAK1			WT	ABIN1	ABIN1xTLR7	ABIN1xMyD88	ABIN1xIRAK4	ABIN1xIRAK1		Table Analyzed	Transform of Blood Ly6C+%							Number of families	1
2.17	12.1	6.14	1.07	2.36	3.82		Shapiro-Wilk normality test								Data sets analyzed	A : WT	B : ABIN1	C : ABIN1xTLR7	D : ABIN1xMyD88	E : ABIN1xIRAK4			Number of comparisons per family	15
1.87	10.6	5.46	3.67	0.38	2.73		W	0.9341	0.9081	0.9525	0.9128	0.9466	0.9199										Alpha	0.05
2.53	8.43	4.07	4.86	3.56	3.96		P value	0.2545	0.3028	0.7173	0.3741	0.7127	0.5294		ANOVA summary
0.86	12.3	3.89	1.45	5.49	7.8		Passed normality test (alpha=0.05)?	Yes	Yes	Yes	Yes	Yes	Yes		F	19.7							Tukey's multiple comparisons test	Mean Diff.	95.00% CI of diff.	Significant?	Summary	Adjusted P Value
4.46	5.63	10.1	1.94	2.45	4.8		P value summary	ns	ns	ns	ns	ns	ns		P value	<0.0001
2.13	9.03	1.46	4.59				Number of values	17	9	9	8	5	5		P value summary	****							WT vs. ABIN1	-0.183	-0.242 to -0.124	Yes	****	<0.0001	A-B
1.86	12.4	4.52	2.19												Significant diff. among means (P < 0.05)?	Yes							WT vs. ABIN1xTLR7	-0.114	-0.173 to -0.0553	Yes	****	<0.0001	A-C
1.52	6.56	10.3	4.02												R square	0.677							WT vs. ABIN1xMyD88	-0.0431	-0.104 to 0.0184	No	ns	0.3138	A-D
0.9	7.01	7.75																					WT vs. ABIN1xIRAK4	-0.0348	-0.108 to 0.0381	No	ns	0.7167	A-E
1.63															Brown-Forsythe test								WT vs. ABIN1xIRAK1	-0.0883	-0.161 to -0.0154	Yes	**	0.0094	A-F
1.75															F (DFn, DFd)	0.956 (5, 47)							ABIN1 vs. ABIN1xTLR7	0.0684	0.000894 to 0.136	Yes	*	0.0454	B-C
0.62															P value	0.4542							ABIN1 vs. ABIN1xMyD88	0.14	0.0701 to 0.209	Yes	****	<0.0001	B-D
0.69															P value summary	ns							ABIN1 vs. ABIN1xIRAK4	0.148	0.0681 to 0.228	Yes	****	<0.0001	B-E
0.59															Are SDs significantly different (P < 0.05)?	No							ABIN1 vs. ABIN1xIRAK1	0.0945	0.0146 to 0.174	Yes	*	0.0119	B-F
2.26																							ABIN1xTLR7 vs. ABIN1xMyD88	0.0713	0.00171 to 0.141	Yes	*	0.0418	C-D
1.04															Bartlett's test								ABIN1xTLR7 vs. ABIN1xIRAK4	0.0796	-0.000293 to 0.16	No	ns	0.0513	C-E
1.48															Bartlett's statistic (corrected)	5.16							ABIN1xTLR7 vs. ABIN1xIRAK1	0.0261	-0.0538 to 0.106	No	ns	0.925	C-F
															P value	0.3965							ABIN1xMyD88 vs. ABIN1xIRAK4	0.0083	-0.0734 to 0.09	No	ns	0.9996	D-E
															P value summary	ns							ABIN1xMyD88 vs. ABIN1xIRAK1	-0.0452	-0.127 to 0.0365	No	ns	0.5742	D-F
DATA SET Blood pMo arcsin(sqrt(6)) transformation															Are SDs significantly different (P < 0.05)?	No							ABIN1xIRAK4 vs. ABIN1xIRAK1	-0.0535	-0.144 to 0.0371	No	ns	0.5043	E-F
WT	ABIN1	ABIN1xTLR7	ABIN1xMyD88	ABIN1xIRAK4	ABIN1xIRAK1
0.147847	0.355277	0.250399	0.103626	0.154234	0.196714										ANOVA table	SS	DF	MS	F (DFn, DFd)	P value
0.137178	0.331621	0.235847	0.192764	0.0616832	0.165988										Treatment (between columns)	0.229	5	0.0458	F (5, 47) = 19.7	P<0.0001			Test details	Mean 1	Mean 2	Mean Diff.	SE of diff.	n1	n2	q	DF
0.159738	0.294587	0.203137	0.22228	0.189817	0.200335										Residual (within columns)	0.109	47	0.00233
0.0928696	0.358333	0.198532	0.120709	0.236506	0.283049										Total	0.339	52						WT vs. ABIN1	0.125	0.308	-0.183	0.0199	17	9	13	47
0.212789	0.239561	0.323414	0.139738	0.157171	0.220881																		WT vs. ABIN1xTLR7	0.125	0.24	-0.114	0.0199	17	9	8.14	47
0.146468	0.305216	0.121126	0.215917												Data summary								WT vs. ABIN1xMyD88	0.125	0.168	-0.0431	0.0207	17	8	2.95	47
0.136808	0.359853	0.214238	0.148532												Number of treatments (columns)	6							WT vs. ABIN1xIRAK4	0.125	0.16	-0.0348	0.0245	17	5	2	47
0.123603	0.259011	0.326718	0.201868												Number of values (total)	53							WT vs. ABIN1xIRAK1	0.125	0.213	-0.0883	0.0245	17	5	5.09	47
0.0950112	0.267959	0.282116																					ABIN1 vs. ABIN1xTLR7	0.308	0.24	0.0684	0.0227	9	9	4.26	47
0.128021																							ABIN1 vs. ABIN1xMyD88	0.308	0.168	0.14	0.0234	9	8	8.43	47
0.132676																							ABIN1 vs. ABIN1xIRAK4	0.308	0.16	0.148	0.0269	9	5	7.78	47
0.0788217																							ABIN1 vs. ABIN1xIRAK1	0.308	0.213	0.0945	0.0269	9	5	4.97	47
0.0831621																							ABIN1xTLR7 vs. ABIN1xMyD88	0.24	0.168	0.0713	0.0234	9	8	4.3	47
0.0768872																							ABIN1xTLR7 vs. ABIN1xIRAK4	0.24	0.16	0.0796	0.0269	9	5	4.19	47
0.150905																							ABIN1xTLR7 vs. ABIN1xIRAK1	0.24	0.213	0.0261	0.0269	9	5	1.37	47
0.102158																							ABIN1xMyD88 vs. ABIN1xIRAK4	0.168	0.16	0.0083	0.0275	8	5	0.427	47
0.121957																							ABIN1xMyD88 vs. ABIN1xIRAK1	0.168	0.213	-0.0452	0.0275	8	5	2.33	47
																							ABIN1xIRAK4 vs. ABIN1xIRAK1	0.16	0.213	-0.0535	0.0305	5	5	2.48	47

## Sheet: 6D sp iMo
DATA SET pMo in spleen							Shapiro-Wilk normality test								Kruskal-Wallis Test			Mann-Whitney test ( WT vs ABIN1 comparison)			Mann-Whitney test (ABIN1 vs ABIN1xTLR7 comparison)
WT	ABIN1	ABIN1xTLR7	ABIN1xMyD88	ABIN1xIRAK4	ABIN1xIRAK1			WT	ABIN1	ABIN1xTLR7	ABIN1xMyD88	ABIN1xIRAK4	ABIN1xIRAK1		Table Analyzed	Spleen Ly6C+		Table Analyzed	Spleen Ly6C+		Table Analyzed	Spleen Ly6C+
0.15755	0.32661	0.15818	0.2438	0.1722	0.29733		Shapiro-Wilk normality test
0.21234	1.48461	0.20424	0.22785	0.106	0.30597		W	0.9086	0.8668	0.7482	0.9491	0.8832	0.7342		Kruskal-Wallis test			Column B	ABIN1		Column C	ABIN1xTLR7
0.16926	0.7998	0.108	0.255767	0.177623	0.266025		P value	0.0946	0.1135	0.0052	0.68	0.3239	0.0211		P value	<0.0001		vs.	vs.		vs.	vs.
0.21201	0.8432	0.28167	0.161452	0.28704	0.25025		Passed normality test (alpha=0.05)?	Yes	Yes	No	Yes	Yes	No		Exact or approximate P value?	Approximate		Column A	WT		Column B	ABIN1
0.3817	0.6216	0.25245	0.190167	0.1798	0.53		P value summary	ns	ns	**	ns	ns	*		P value summary	****
0.2384	0.4515	0.19005	0.287103				Number of values	17	9	9	9	5	5		Do the medians vary signif. (P < 0.05)?	Yes		Mann Whitney test			Mann Whitney test
0.1537	0.3332	0.2655	0.397582												Number of groups	6		P value	<0.0001		P value	0.0028
0.14712	0.7614	0.35636	0.31262												Kruskal-Wallis statistic	31.5		Exact or approximate P value?	Exact		Exact or approximate P value?	Exact
0.11305	0.588	0.77298	0.1967															P value summary	****		P value summary	**
0.14376															Data summary			Significantly different (P < 0.05)?	Yes		Significantly different (P < 0.05)?	Yes
0.06015															Number of treatments (columns)	6		One- or two-tailed P value?	Two-tailed		One- or two-tailed P value?	Two-tailed
0.113349															Number of values (total)	54		Sum of ranks in column A,B	155 , 196		Sum of ranks in column B,C	118 , 53
0.17766																		Mann-Whitney U	2		Mann-Whitney U	8
0.182
0.040596																		Difference between medians			Difference between medians
0.14934																		Median of column A	0.1537, n=17		Median of column B	0.6216, n=9
0.07488																		Median of column B	0.6216, n=9		Median of column C	0.2525, n=9
																		Difference: Actual	0.4679		Difference: Actual	-0.3692
																		Difference: Hodges-Lehmann	0.4745		Difference: Hodges-Lehmann	-0.3838
																		Mann-Whitney test ( WT vs ABIN1xTLR7 comparison)			Mann-Whitney test (ABIN1 vs ABIN1xMyD88 comparison)
																		Table Analyzed	Spleen Ly6C+		Table Analyzed	Spleen Ly6C+
																		Column C	ABIN1xTLR7		Column D	ABIN1xMyd88
																		vs.	vs.		vs.	vs.
																		Column A	WT		Column B	ABIN1
																		Mann Whitney test			Mann Whitney test
																		P value	0.0183		P value	0.0002
																		Exact or approximate P value?	Exact		Exact or approximate P value?	Exact
																		P value summary	*		P value summary	***
																		Significantly different (P < 0.05)?	Yes		Significantly different (P < 0.05)?	Yes
																		One- or two-tailed P value?	Two-tailed		One- or two-tailed P value?	Two-tailed
																		Sum of ranks in column A,C	186 , 165		Sum of ranks in column B,D	124 , 47
																		Mann-Whitney U	33		Mann-Whitney U	2
																		Difference between medians			Difference between medians
																		Median of column A	0.1537, n=17		Median of column B	0.6216, n=9
																		Median of column C	0.2525, n=9		Median of column D	0.2438, n=9
																		Difference: Actual	0.09875		Difference: Actual	-0.3778
																		Difference: Hodges-Lehmann	0.09089		Difference: Hodges-Lehmann	-0.3938
																		Mann-Whitney test ( WT vs ABIN1xMyD88 comparison)			Mann-Whitney test (ABIN1 vs ABIN1xIRAK4 comparison)
																		Table Analyzed	Spleen Ly6C+		Table Analyzed	Spleen Ly6C+
																		Column D	ABIN1xMyd88		Column E	ABIN1xIRAK4
																		vs.	vs.		vs.	vs.
																		Column A	WT		Column B	ABIN1
																		Mann Whitney test			Mann Whitney test
																		P value	0.0018		P value	0.001
																		Exact or approximate P value?	Exact		Exact or approximate P value?	Exact
																		P value summary	**		P value summary	***
																		Significantly different (P < 0.05)?	Yes		Significantly different (P < 0.05)?	Yes
																		One- or two-tailed P value?	Two-tailed		One- or two-tailed P value?	Two-tailed
																		Sum of ranks in column A,D	174 , 177		Sum of ranks in column B,E	90 , 15
																		Mann-Whitney U	21		Mann-Whitney U	0
																		Difference between medians			Difference between medians
																		Median of column A	0.1537, n=17		Median of column B	0.6216, n=9
																		Median of column D	0.2438, n=9		Median of column E	0.1776, n=5
																		Difference: Actual	0.0901		Difference: Actual	-0.444
																		Difference: Hodges-Lehmann	0.08657		Difference: Hodges-Lehmann	-0.4494
																		Mann-Whitney test ( WT vs ABIN1xIRAK4 comparison)			Mann-Whitney test (ABIN1 vs ABIN1xIRAK1 comparison)
																		Table Analyzed	Spleen Ly6C+		Table Analyzed	Spleen Ly6C+
																		Column E	ABIN1xIRAK4		Column F	ABIN1xIRAK1
																		vs.	vs.		vs.	vs.
																		Column A	WT		Column B	ABIN1
																		Mann Whitney test			Mann Whitney test
																		P value	0.4456		P value	0.007
																		Exact or approximate P value?	Exact		Exact or approximate P value?	Exact
																		P value summary	ns		P value summary	**
																		Significantly different (P < 0.05)?	No		Significantly different (P < 0.05)?	Yes
																		One- or two-tailed P value?	Two-tailed		One- or two-tailed P value?	Two-tailed
																		Sum of ranks in column A,E	185 , 68		Sum of ranks in column B,F	87 , 18
																		Mann-Whitney U	32		Mann-Whitney U	3
																		Difference between medians			Difference between medians
																		Median of column A	0.1537, n=17		Median of column B	0.6216, n=9
																		Median of column E	0.1776, n=5		Median of column F	0.2973, n=5
																		Difference: Actual	0.02392		Difference: Actual	-0.3243
																		Difference: Hodges-Lehmann	0.02508		Difference: Hodges-Lehmann	-0.3156
																		Mann-Whitney test ( WT vs ABIN1xIRAK1 comparison)
																		Table Analyzed	Spleen Ly6C+
																		Column F	ABIN1xIRAK1
																		vs.	vs.
																		Column A	WT
																		Mann Whitney test
																		P value	0.0009
																		Exact or approximate P value?	Exact
																		P value summary	***
																		Significantly different (P < 0.05)?	Yes
																		One- or two-tailed P value?	Two-tailed
																		Sum of ranks in column A,F	157 , 96
																		Mann-Whitney U	4
																		Difference between medians
																		Median of column A	0.1537, n=17
																		Median of column F	0.2973, n=5
																		Difference: Actual	0.1436
																		Difference: Hodges-Lehmann	0.148

## Sheet: 6E pMo blood ABINxRAG2
RAW DATA iMo blood					Shapiro-Wilk test						Kruskal-Wallis test			Mann Whitney test
WT	ABIN1	RAG2	ABINxRAG2			WT	ABIN1	RAG2	ABINxRAG2		Table Analyzed	Blood Ly6C-		Table Analyzed	Blood Ly6C-
0.011548	0.21835	0.015163	0.189696		Test for normal distribution
0.011642	0.100528	0.017875	0.165268		Shapiro-Wilk test						Kruskal-Wallis test			Column B	ABIN1
0.001818	0.03923	0.009579	0.113614		W	0.7572	0.9402	0.9485	0.9243		P value	0.0005		vs.	vs.
	0.056765	0.005014	0.130481		P value	0.0159	0.6673	0.7283	0.2867		Exact or approximate P value?	Approximate		Column A	WT
	0.159795	0.009266	0.263525		Passed normality test (alpha=0.05)?	No	Yes	Yes	Yes		P value summary	***
		0.002974	0.115522		P value summary	*	ns	ns	ns		Do the medians vary signif. (P < 0.05)?	Yes		Mann Whitney test
			0.23895								Number of groups	4		P value	0.0357
			0.125614		Number of values	3	5	6	13		Kruskal-Wallis statistic	17.95		Exact or approximate P value?	Exact
			0.15998											P value summary	*
			0.137488								Data summary			Significantly different (P < 0.05)?	Yes
			0.056469								Number of treatments (columns)	4		One- or two-tailed P value?	Two-tailed
			0.106989								Number of values (total)	27		Sum of ranks in column A,B	6 , 30
			0.107721											Mann-Whitney U	0
														Difference between medians
														Median of column A	0.01155, n=3
														Median of column B	0.1005, n=5
														Difference: Actual	0.08898
														Difference: Hodges-Lehmann	0.08898
														Mann Whitney test
														Table Analyzed	Blood Ly6C-
														Column D	ABINxRAG2
														vs.	vs.
														Column B	ABIN1
														Mann Whitney test
														P value	0.2887
														Exact or approximate P value?	Exact
														P value summary	ns
														Significantly different (P < 0.05)?	No
														One- or two-tailed P value?	Two-tailed
														Sum of ranks in column B,D	36 , 135
														Mann-Whitney U	21
														Difference between medians
														Median of column B	0.1005, n=5
														Median of column D	0.1305, n=13
														Difference: Actual	0.02995
														Difference: Hodges-Lehmann	0.03696
														Mann Whitney test
														Table Analyzed	Blood Ly6C-
														Column D	ABINxRAG2
														vs.	vs.
														Column C	RAG2
														Mann Whitney test
														P value	<0.0001
														Exact or approximate P value?	Exact
														P value summary	****
														Significantly different (P < 0.05)?	Yes
														One- or two-tailed P value?	Two-tailed
														Sum of ranks in column C,D	21 , 169
														Mann-Whitney U	0
														Difference between medians
														Median of column C	0.009423, n=6
														Median of column D	0.1305, n=13
														Difference: Actual	0.1211
														Difference: Hodges-Lehmann	0.1211

## Sheet: 6F iMo blood RAG2
RAW DATA pMo blood					Shapiro-Wilk test						One-way ANOVA								Tukey's multiple comparisons test
WT	ABIN1	RAG2	ABINxRAG2			WT	ABIN1	RAG2	ABINxRAG2
0.02168	0.03905	0.031579	0.097318		Test for normal distribution						Table Analyzed	Blood ly6C+							Number of families	1
0.024045	0.045384	0.020214	0.118721		Shapiro-Wilk test						Data sets analyzed	A-D							Number of comparisons per family	6
0.008296	0.023986	0.009874	0.069015		W	0.8597	0.8868	0.8705	0.9722										Alpha	0.05
	0.08624	0.008638	0.078585		P value	0.2668	0.3414	0.2282	0.9195		ANOVA summary
	0.092972	0.010615	0.103505		Passed normality test (alpha=0.05)?	Yes	Yes	Yes	Yes		F	14.85							Tukey's multiple comparisons test	Mean Diff.	95.00% CI of diff.	Significant?	Summary	Adjusted P Value
		0.017167	0.067807		P value summary	ns	ns	ns	ns		P value	<0.0001							WT vs. ABIN1	-0.03952	-0.08581 to 0.006766	No	ns	0.1135	A-B
			0.131625								P value summary	****							WT vs. RAG2	0.001659	-0.04316 to 0.04648	No	ns	0.9996	A-C
			0.075512		Number of values	3	5	6	13		Significant diff. among means (P < 0.05)?	Yes							WT vs. ABINxRAG2	-0.0644	-0.1047 to -0.02408	Yes	**	0.001	A-D
			0.093883								R square	0.6499							ABIN1 vs. RAG2	0.04118	0.002801 to 0.07956	Yes	*	0.0323	B-C
			0.095941																ABIN1 vs. ABINxRAG2	-0.02488	-0.05790 to 0.008137	No	ns	0.1886	B-D
			0.049334								Brown-Forsythe test								RAG2 vs. ABINxRAG2	-0.06606	-0.09699 to -0.03514	Yes	****	<0.0001	C-D
			0.044203								F (DFn, DFd)	2.233 (3, 24)
			0.059201								P value	0.1103							Test details	Mean 1	Mean 2	Mean Diff.	SE of diff.	n1	n2	q	DF
											P value summary	ns							WT vs. ABIN1	0.01801	0.05753	-0.03952	0.01678	3	5	3.331	24
											Are SDs significantly different (P < 0.05)?	No							WT vs. RAG2	0.01801	0.01635	0.001659	0.01625	3	6	0.1444	24
																			WT vs. ABINxRAG2	0.01801	0.08241	-0.0644	0.01462	3	14	6.231	24
											Bartlett's test								ABIN1 vs. RAG2	0.05753	0.01635	0.04118	0.01391	5	6	4.186	24
											Bartlett's statistic (corrected)								ABIN1 vs. ABINxRAG2	0.05753	0.08241	-0.02488	0.01197	5	14	2.94	24
											P value								RAG2 vs. ABINxRAG2	0.01635	0.08241	-0.06606	0.01121	6	14	8.334	24
											P value summary
											Are SDs significantly different (P < 0.05)?
											ANOVA table	SS	DF	MS	F (DFn, DFd)	P value
											Treatment (between columns)	0.02352	3	0.007839	F (3, 24) = 14.85	P<0.0001
											Residual (within columns)	0.01267	24	0.0005279
											Total	0.03619	27
											Data summary
											Number of treatments (columns)	4
											Number of values (total)	28

## Sheet: 6G pMo spleen ABIN1xRAG2
RAW DATA pMo spleen					Shapiro-Wilk test						Kruskal-Wallis test			Mann Whitney test
WT	ABIN1	RAG2	ABINxRAG2			WT	ABIN1	RAG2	ABINxRAG2		Table Analyzed	Spleen Ly6C-		Table Analyzed	Spleen Ly6C-
0.057164	3.432	0.09116	1.31216		Test for normal distribution
0.087936	0.8064	0.070596	0.82992		Shapiro-Wilk test						Kruskal-Wallis test			Column B	ABIN1
0.046436	2.464	0.07611	1.46095		W	0.9279	0.8472	0.9097	0.8199		P value	0.0005		vs.	vs.
	0.5777	0.08568	0.88049		P value	0.4806	0.1858	0.4344	0.0119		Exact or approximate P value?	Approximate		Column A	WT
	3.336	0.06806	1.13013		Passed normality test (alpha=0.05)?	Yes	Yes	Yes	No		P value summary	***
		0.112359	0.77724		P value summary	ns	ns	ns	*		Do the medians vary signif. (P < 0.05)?	Yes		Mann Whitney test
			2.2922								Number of groups	4		P value	0.0357
			0.94584		Number of values	3	5	6	13		Kruskal-Wallis statistic	17.87		Exact or approximate P value?	Exact
			0.97552											P value summary	*
			1.11419								Data summary			Significantly different (P < 0.05)?	Yes
			0.619417								Number of treatments (columns)	4		One- or two-tailed P value?	Two-tailed
			2.29738								Number of values (total)	27		Sum of ranks in column A,B	6 , 30
			2.30214											Mann-Whitney U	0
														Difference between medians
														Median of column A	0.05716, n=3
														Median of column B	2.464, n=5
														Difference: Actual	2.407
														Difference: Hodges-Lehmann	2.407
														Mann Whitney test
														Table Analyzed	Spleen Ly6C-
														Column D	ABINxRAG2
														vs.	vs.
														Column B	ABIN1
														Mann Whitney test
														P value	0.443
														Exact or approximate P value?	Exact
														P value summary	ns
														Significantly different (P < 0.05)?	No
														One- or two-tailed P value?	Two-tailed
														Sum of ranks in column B,D	56 , 115
														Mann-Whitney U	24
														Difference between medians
														Median of column B	2.464, n=5
														Median of column D	1.114, n=13
														Difference: Actual	-1.35
														Difference: Hodges-Lehmann	-1.044
														Mann Whitney test
														Table Analyzed	Spleen Ly6C-
														Column D	ABINxRAG2
														vs.	vs.
														Column C	RAG2
														Mann Whitney test
														P value	<0.0001
														Exact or approximate P value?	Exact
														P value summary	****
														Significantly different (P < 0.05)?	Yes
														One- or two-tailed P value?	Two-tailed
														Sum of ranks in column C,D	21 , 169
														Mann-Whitney U	0
														Difference between medians
														Median of column C	0.08090, n=6
														Median of column D	1.114, n=13
														Difference: Actual	1.033
														Difference: Hodges-Lehmann	1.026

## Sheet: 6H iMo spleen ABIN1xRAG2
RAW DATA pMo spleen					Shapiro-Wilk test						One-way ANOVA							Tukey's multiple comparisons test
WT	ABIN1	RAG2	ABINxRAG2			WT	ABIN1	RAG2	ABINxRAG2									Number of families	1
0.16596	0.9328	0.47276	0.67968		Test for normal distribution						Table Analyzed	Spleen Ly6C+						Number of comparisons per family	6
0.28396	1.1952	0.445518	1.00776		Shapiro-Wilk test						Data sets analyzed	A-D						Alpha	0.05
0.0988	1.808	0.42303	1.20708		W	0.9755	0.9565	0.8668	0.867
	0.7957	0.37366	1.03679		P value	0.6997	0.7833	0.2137	0.0599		ANOVA summary							Tukey's multiple comparisons test	Mean Diff.	95.00% CI of diff.	Significant?	Summary	Adjusted P Value
	1.5151	0.153135	0.95693		Passed normality test (alpha=0.05)?	Yes	Yes	Yes	Yes		F	18.11						WT vs. ABIN1	-1.066	-1.630 to -0.5030	Yes	***	0.0002	A-B
		0.215472	0.87376		P value summary	ns	ns	ns	ns		P value	<0.0001						WT vs. RAG2	-0.1644	-0.7099 to 0.3812	No	ns	0.8365	A-C
			1.8055								P value summary	****						WT vs. ABINxRAG2	-0.8815	-1.380 to -0.3835	Yes	***	0.0004	A-D
			1.23297		Number of values	3	5	6	12		Significant diff. among means (P < 0.05)?	Yes						ABIN1 vs. RAG2	0.9021	0.4349 to 1.369	Yes	***	0.0001	B-C
			1.21617								R square	0.7117						ABIN1 vs. ABINxRAG2	0.1849	-0.2257 to 0.5956	No	ns	0.6027	B-D
			0.959195															RAG2 vs. ABINxRAG2	-0.7172	-1.103 to -0.3314	Yes	***	0.0002	C-D
			0.986								Brown-Forsythe test
			0.81141								F (DFn, DFd)	1.654 (3, 22)						Test details	Mean 1	Mean 2	Mean Diff.	SE of diff.	n1	n2	q	DF
											P value	0.2059						WT vs. ABIN1	0.1829	1.249	-1.066	0.2029	3	5	7.433	22
											P value summary	ns						WT vs. RAG2	0.1829	0.3473	-0.1644	0.1965	3	6	1.183	22
											Are SDs significantly different (P < 0.05)?	No						WT vs. ABINxRAG2	0.1829	1.064	-0.8815	0.1793	3	12	6.951	22
																		ABIN1 vs. RAG2	1.249	0.3473	0.9021	0.1682	5	6	7.583	22
											Bartlett's test							ABIN1 vs. ABINxRAG2	1.249	1.064	0.1849	0.1479	5	12	1.768	22
											Bartlett's statistic (corrected)							RAG2 vs. ABINxRAG2	0.3473	1.064	-0.7172	0.1389	6	12	7.301	22
											P value
											P value summary
											Are SDs significantly different (P < 0.05)?
											ANOVA table	SS	DF	MS	F (DFn, DFd)	P value
											Treatment (between columns)	4.193	3	1.398	F (3, 22) = 18.11	P<0.0001
											Residual (within columns)	1.698	22	0.07719
											Total	5.891	25
											Data summary
											Number of treatments (columns)	4
											Number of values (total)	26

## Sheet: 6I pMo blood ABIN1xIL6
RAW DATA pMo % in blood					Shapiro-Wilk test						One-way ANOVA							Tukey's multiple comparisons test
WT	ABIN1	IL-6	ABIN1xIL-6			WT	ABIN1	IL-6	ABIN1xIL-6									Number of families	1
4.49	17.1	4.49	14.5		Test for normal distribution						Table Analyzed	Transform of %Blood Ly6C-						Number of comparisons per family	6
4.46	29.3	4.46	18.9		Shapiro-Wilk test						Data sets analyzed	A-D						Alpha	0.05
1.25	18.3	1.25	23.6		W	0.842	0.9162	0.9326	0.9124
0.44	32.2	0.44	19.8		P value	0.1707	0.5056	0.5396	0.4522		ANOVA summary							Tukey's multiple comparisons test	Mean Diff.	95.00% CI of diff.	Significant?	Summary	Adjusted P Value
0.91	49	0.91	19.3		Passed normality test (alpha=0.05)?	Yes	Yes	Yes	Yes		F	42.55						WT vs. ABIN1	-0.4238	-0.5657 to -0.2819	Yes	****	<0.0001	A-B
		1.51	23.1		P value summary	ns	ns	ns	ns		P value	<0.0001						WT vs. IL-6	-0.005137	-0.1331 to 0.1228	No	ns	0.9995	A-C
		2.84									P value summary	****						WT vs. ABIN1xIL-6	-0.3208	-0.4567 to -0.1849	Yes	****	<0.0001	A-D
		2.82			Number of values	5	5	8	6		Significant diff. among means (P < 0.05)?	Yes						ABIN1 vs. IL-6	0.4186	0.2907 to 0.5466	Yes	****	<0.0001	B-C
											R square	0.8645						ABIN1 vs. ABIN1xIL-6	0.103	-0.03288 to 0.2389	No	ns	0.1804	B-D
Sqrt arcsin transofrmation																		IL-6 vs. ABIN1xIL-6	-0.3156	-0.4368 to -0.1945	Yes	****	<0.0001	C-D
WT	ABIN1	IL-6	ABIN1xIL-6								Brown-Forsythe test
0.213515	0.426318	0.213515	0.390649								F (DFn, DFd)	2.350 (3, 20)						Test details	Mean 1	Mean 2	Mean Diff.	SE of diff.	n1	n2	q	DF
0.212789	0.571976	0.212789	0.449751								P value	0.103						WT vs. ABIN1	0.1401	0.5638	-0.4238	0.0507	5	5	11.82	20
0.112038	0.442041	0.112038	0.507276								P value summary	ns						WT vs. IL-6	0.1401	0.1452	-0.005137	0.0457	5	8	0.159	20
0.0663812	0.603406	0.0663812	0.461143								Are SDs significantly different (P < 0.05)?	No						WT vs. ABIN1xIL-6	0.1401	0.4608	-0.3208	0.04854	5	6	9.345	20
0.0955392	0.775397	0.0955392	0.454839															ABIN1 vs. IL-6	0.5638	0.1452	0.4186	0.0457	5	8	12.95	20
		0.123193	0.501367								Bartlett's test							ABIN1 vs. ABIN1xIL-6	0.5638	0.4608	0.103	0.04854	5	6	3	20
		0.169331									Bartlett's statistic (corrected)	7.877						IL-6 vs. ABIN1xIL-6	0.1452	0.4608	-0.3156	0.0433	8	6	10.31	20
		0.168728									P value	0.0486
											P value summary	*
											Are SDs significantly different (P < 0.05)?	Yes
											ANOVA table	SS	DF	MS	F (DFn, DFd)	P value
											Treatment (between columns)	0.8204	3	0.2735	F (3, 20) = 42.55	P<0.0001
											Residual (within columns)	0.1285	20	0.006427
											Total	0.9489	23
											Data summary
											Number of treatments (columns)	4
											Number of values (total)	24

## Sheet: 6J iMo blood ABIN1xIL6
RAW DATA pMo % in blood					Shapiro-Wilk test						One-way ANOVA							Tukey's multiple comparisons test
WT	ABIN1	IL-6	ABIN1xIL-6			WT	ABIN1	IL-6	ABIN1xIL-6									Number of families	1
3.65	5.21	3.89	10.6		Test for normal distribution						Table Analyzed	Transform of % Blood Ly6C+						Number of comparisons per family	6
3.69	9.48	1.72	14.9		Shapiro-Wilk test						Data sets analyzed	A-D						Alpha	0.05
2.52	9.25	2.69	9.43		W	0.9056	0.9417	0.954	0.9067
2.15	8	1.92	13.1		P value	0.4416	0.6781	0.7516	0.415		ANOVA summary							Tukey's multiple comparisons test	Mean Diff.	95.00% CI of diff.	Significant?	Summary	Adjusted P Value
1.62	11.5	1.64	13.3		Passed normality test (alpha=0.05)?	Yes	Yes	Yes	Yes		F	47.27						WT vs. ABIN1	-0.1331	-0.1982 to -0.06796	Yes	****	<0.0001	A-B
		3.2	14		P value summary	ns	ns	ns	ns		P value	<0.0001						WT vs. IL-6	0.009526	-0.04915 to 0.06820	No	ns	0.968	A-C
		0.77									P value summary	****						WT vs. ABIN1xIL-6	-0.1973	-0.2596 to -0.1349	Yes	****	<0.0001	A-D
		4.16			Number of values	5	5	8	6		Significant diff. among means (P < 0.05)?	Yes						ABIN1 vs. IL-6	0.1426	0.08391 to 0.2013	Yes	****	<0.0001	B-C
											R square	0.8764						ABIN1 vs. ABIN1xIL-6	-0.06419	-0.1265 to -0.001866	Yes	*	0.0421	B-D
Sqrt arcsin transofrmation																		IL-6 vs. ABIN1xIL-6	-0.2068	-0.2624 to -0.1512	Yes	****	<0.0001	C-D
WT	ABIN1	IL-6	ABIN1xIL-6								Brown-Forsythe test
0.192231	0.230284	0.198532	0.331621								F (DFn, DFd)	0.3067 (3, 20)						Test details	Mean 1	Mean 2	Mean Diff.	SE of diff.	n1	n2	q	DF
0.193295	0.312981	0.131528	0.396297								P value	0.8202						WT vs. ABIN1	0.1639	0.297	-0.1331	0.02326	5	5	8.091	20
0.159419	0.309034	0.164757	0.312126								P value summary	ns						WT vs. IL-6	0.1639	0.1544	0.009526	0.02096	5	8	0.6426	20
0.147159	0.286757	0.139011	0.370347								Are SDs significantly different (P < 0.05)?	No						WT vs. ABIN1xIL-6	0.1639	0.3612	-0.1973	0.02227	5	6	12.53	20
0.127625	0.345978	0.128415	0.373302															ABIN1 vs. IL-6	0.297	0.1544	0.1426	0.02096	5	8	9.619	20
		0.179853	0.383497								Bartlett's test							ABIN1 vs. ABIN1xIL-6	0.297	0.3612	-0.06419	0.02227	5	6	4.077	20
		0.0878626									Bartlett's statistic (corrected)	0.8133						IL-6 vs. ABIN1xIL-6	0.1544	0.3612	-0.2068	0.01986	8	6	14.72	20
		0.205402									P value	0.8463
											P value summary	ns
											Are SDs significantly different (P < 0.05)?	No
											ANOVA table	SS	DF	MS	F (DFn, DFd)	P value
											Treatment (between columns)	0.1918	3	0.06393	F (3, 20) = 47.27	P<0.0001
											Residual (within columns)	0.02705	20	0.001352
											Total	0.2188	23
											Data summary
											Number of treatments (columns)	4
											Number of values (total)	24

[truncated: 2 more sheets: 6K pMo spleen ABIN1xIL6, 6L iMo spleen ABIN1xIL6]
