# Supplementary material for: Distinct signals and immune cells drive liver pathology and glomerulonephritis in ABIN1[D485N] mice
Source: Life Sci Alliance. 2019 Nov 6;2(6):e201900533. doi: 10.26508/lsa.201900533 (PMC6836709; doi:10.26508/lsa.201900533)
Supplement: Supplementary file 7 [file LSA-2019-00533_TableS1.xlsx]

## Sheet: Sheet1
Table S1. Upregulation of genes involved in NETosis in ABIN1[D485N] pMo, iMo and neutrophils. Abbreviations FC, fold change in expression ABIN1[D485N]/WT; FDR, false discovery rate.
			pMo		iMo		Neutrophils
Gene name	Protein	Function	Log2FC	FDR	Log2FC	FDR	Log2FC	FDR
Camp	cathelicidin	Antimicrobial proteinase	5	0	2.7	0.01	2.46	0.009
Ctsg	cathepsin G	Antimicrobial proteinase	7.1	0	5.6	0	4.08	0
Elane	elastase,	Anti-microbial proteinase	8.7	0	4.4	0	3.84	0
Mpo	myeloperoxidase	Enzyme generating hypochlorous acid to promote microbial killing	6.8	0	4.5	0	4.43	0
Prtn3	proteinase 3	Antimicrobial proteinase closely related to Elane	7.4	0	5	0	3.9	0
S100a8	S100 calcium binding protein A8	S100a8/S100a9 heterodimers activate TLR4	4.6	0	2.4	0.002	1.16	0.218
S100a9	S100 calcium binding protein A9	S100a8/S100a9 heterodimers activate TLR4	4.3	0	2	0.015	1.24	0.156
Ltf	lactotransferrin	Iron-binding glycoprotein, that modulates immune function	4	0	2.2	0.029	2.79	0.002
