# Supplementary material for: Distinct signals and immune cells drive liver pathology and glomerulonephritis in ABIN1[D485N] mice
Source: Life Sci Alliance. 2019 Nov 6;2(6):e201900533. doi: 10.26508/lsa.201900533 (PMC6836709; doi:10.26508/lsa.201900533)
Supplement: Supplementary file 11 [file LSA-2019-00533_TableS3.xlsx]

## Sheet: Sheet1
Table S3. The antibodies used in this paper
Antibodies	Fluorophore	Clone	Dilution	Source
CD115	APC	AFS98	1:200	Biolegend
CD11B	PE/CY7	M1/70	1:600	Biolegend
CD11C	PE/DAZZLE594	N418	1:200	Biolegend
CD45	BV510	30-F11	1:200	Biolegend
CX3CR1	PE	SA011F11	1:200	Biolegend
I-A/I-E
(MHC II)	Alexafluor700	M5/114.15.2	1:200	Biolegend
LY-6C	FITC	HK1.4	1:400	Biolegend
LY-6G/LY-6C (GR-1)	PERCP/CY5.5	RB6-8C5	1:400	Biolegend
NK1.1	APC/CY7	PK136	1:200	Biolegend
CD45R (B220)	APC	RA3-6B2	1:200	Thermo fisher
CD95 (FAS)	PE	SA367H8	1:400	Biolegend
GL7	FITC	GL7	1:400	Biolegend
CD4	PERCP/CY5.5	GK1.5	1:200	Biolegend
CXCR5	APC	L138D7	1:100	Biolegend
PD-1	BV421	29F.1A12	1:100	Biolegend
TCR-Β	FITC	H57-597	1:50	Biolegend
CD45.1	FITC	A20	1:200	Biolegend
CD45.2	PERCP/CY5.5	104	1:200	Biolegend
MPO	FITC	2D4	1:50	Abcam
CX3CR1	BV510	SA011F11	1:200	Biolegend
LY-6C	BV421	HK1.4	1:400	Biolegend
LY-6C	APC/CY7	HK1.4	1:200	Biolegend
CD11B	BV510	M1/70	1:200	BioLegend
CD3Ε	Biotin	145-2C11	0.25µl for 1x106 cells	Biolegend
CD19	Biotin	M1/70	0.25µl for 1x106 cells	Biolegend
LY-6G	Biotin	1A8	0.25µl for 1x106 cells	Biolegend
TER-119	Biotin	TER-119	0.25µl for 1x106 cells	Biolegend
NK1.1	Biotin	PK136	0.25µl for 1x106 cells	Biolegend
